# Supplementary material for: Highly efficient generation of bacteria leaf blight resistance and transgene-free rice using genome editing and multiplexed selection system
Source: Research Square preprint supplement (doi:10.21203/rs.3.rs-121447/v1), 2020-12-17
Supplement: Supplementary file 2 [file 4e4ce1f57438ea5e57fdf2ee.xlsx]

## Sheet: Sheet1
				Explants #	Positive #	TF	Mutants	Mutant rate
		Independent transformation event	24277-1	168	59	0.351	16	0.271
			24277-2	100	39	0.39	16	0.41
			24277-3	224	129	0.461	58	0.45
			24259-1	168	68	0.405	32	0.471
			24259-2	100	76	0.76	42	0.553
			24259-3	192	170	0.685	103	0.606
		Summary	24277	492	227	0.461	90	0.396
			24259	460	314	0.683	177	0.564
				Detection of RFP expression							Taqman assay
		Event ID	Construct	No. seeds RFP+	No. seeds RFP-	Transgene-free %	Observed ratio	Expected ratio	χ2		T-DNA +	T-DNA -	Transgene-free %	Observed ratio	Expected ratio	χ2	Ave. accuracy rate of visual selection
		L18	24277	103	97	0.485	1 : 0.94	1 : 1	0.18		69	61	0.469231	1 : 0.88	1 : 1	0.49	0.9862
		L31		98	103	0.512438	1 : 1.05	1 : 1	0.12		96	101	0.51269	1 : 1.05	1 : 1	0.13
		L33		98	102	0.51	1 : 1.04	1 : 1	0.08		96	101	0.51269	1 : 1.05	1 : 1	0.13
		L5		98	103	0.512438	1 : 1.05	1 : 1	0.12		93	99	0.515625	1 : 1.06	1 : 1	0.19
		L4		93	107	0.535	1 : 1.15	1 : 1	0.98		92	106	0.535354	1 : 1.15	1 : 1	0.99
		L8	24259								146	44	0.231579	3.30 : 1	3 : 1	0.34	N/A
		L21									148	48	0.244898	3.08 : 1	3 : 1	0.03
		L22									151	37	0.196809	4.08 : 1	3 : 1	2.84
		L26									143	51	0.262887	2.80 : 1	3 : 1	0.17
		L34									140	59	0.296482	2.37 : 1	3 : 1	2.29
