# Supplementary material for: Highly efficient generation of bacteria leaf blight resistance and transgene-free rice using genome editing and multiplexed selection system
Source: Research Square preprint supplement (doi:10.21203/rs.3.rs-121447/v1), 2020-12-17
Supplement: Supplementary file 3 [file c211d32fee21e53680aee902.xlsx]

## Sheet: Colony seq Summary
Row Labels	计数项:clone
(blank)
(blank)
RIKS180900A009A	6
|TAGGGGGAGAT -> ----------- on 484-494 with type as -----------	3
|GGGGAGATG -> --------- on 487-495 with type as ---------	3
RIKS180900A014A	6
|GGGAGATGC -> --------- on 488-496 with type as ---------	6
RIKS180900A030A	7
|GGGGAGAT -> -------- on 487-494 with type as --------;G -> C on 495-495 with type as v	4
|GGGAGATGCA -> ---------- on 488-497 with type as ----------	3
RIKS180900A042A	6
Wild-Type	1
|GATGCA -> ------ on 492-497 with type as ------	2
|G -> T on 492-492 with type as v	1
Double peaks	2
RIKS180900A053A	7
|GGGGAGATG -> --------- on 487-495 with type as ---------	6
|GGGAGATG -> -------- on 488-495 with type as --------	1
RIKS180901A008A	8
Wild-Type	4
|AGATG -> ----- on 491-495 with type as -----	3
|GGGGGAGATGCA -> ------------ on 486-497 with type as ------------	1
RIKS180901A022A	7
|GGAGATGCATATCTAAC -> ----------------- on 489-505 with type as -----------------	5
|GGGGGAGATGCATA -> -------------- on 486-499 with type as --------------	2
RIKS180901A025A	7
|GGGGAGATGC -> ---------- on 487-496 with type as ----------	3
|GGAGATG -> ------- on 489-495 with type as -------	4
RIKS180901A033A	6
|GTAGGGGGAGATGCA -> --------------- on 483-497 with type as ---------------	4
|GGGGAGA -> ------- on 487-493 with type as -------;G -> - on 495-495 with type as -	1
Double peaks	1
RIKS180901A034A	8
|AGGGGGAGATGCATATCTAA -> -------------------- on 485-504 with type as --------------------	5
|GGGAGATG -> -------- on 488-495 with type as --------	3
RIKS180901A039A	8
Wild-Type	2
|GTAGGGGGAGATGCA -> --------------- on 483-497 with type as ---------------	1
|GGGAGATG -> -------- on 488-495 with type as --------	1
|GGGGAGATGCATAT -> -------------- on 487-500 with type as --------------	3
|GGAGATGCATATCTAA -> ---------------- on 489-504 with type as ---------------	1
RIKS180901A046A	8
|GTACAGTAGGGGGAGATGC -> ------------------- on 478-496 with type as -------------------	6
|GGGGGAGA -> -------- on 486-493 with type as --------;G -> - on 495-495 with type as -	2
RIKS180901A049A	7
|GGGGAGATG -> --------- on 487-495 with type as ---------	4
|GGAGATG -> ------- on 489-495 with type as -------	3
RIKS180901A061A	8
|GGGAGATGC -> --------- on 488-496 with type as ---------	1
|GGGAGATGCAT -> ----------- on 488-498 with type as -----------	1
|TAGGGGGAGATGC -> ------------- on 484-496 with type as -------------	6
RIKS181300A021A	8
|GGGG -> ---- on 487-490 with type as ----;GATG -> ---- on 492-495 with type as ----	3
|AGGGGGAGAT -> ---------- on 485-494 with type as ----------	5
RIKS181301A004A	8
|GCATA -> ----- on 495-499 with type as -----;C -> - on 501-501 with type as -	2
|CTTTTGGTGGT -> ----------- on 467-477 with type as -----------;T -> A on 479-479 with type as v;C -> A on 481-481 with type as v;GT -> AA on 483-484 with type as iv;G -> A on 486-486 with type as i;GGGG -> ---- on 487-490 with type as ----;T -> A on 494	4
Double peaks	2
RIKS181301A010A	7
Wild-Type	1
|GGGGAGATG -> --------- on 487-495 with type as ---------	4
|GGGGAGATGC -> ---------- on 487-496 with type as ----------	1
|GGGGGAGATGCATAT -> --------------- on 486-500 with type as ---------------	1
RIKS181301A021A	8
Wild-Type	3
|GGAGATG -> ------- on 489-495 with type as -------	1
|GGGGAGATGCATATCTA -> ----------------- on 487-503 with type as -----------------	3
Double peaks	1
RIKS181301A039A	8
Wild-Type	3
|GAGATGCA -> -------- on 490-497 with type as --------	3
Double peaks	2
RIKS181301A046A	8
|GGGGAGATG -> --------- on 487-495 with type as ---------	6
|GTAGGGGGAGATG -> ------------- on 483-495 with type as -------------	2
RIKS181301A051A	7
|AGGGGGAGATGCATATCTAACCT -> ----------------------- on 485-507 with type as -----------------------	4
|GGGG -> ---- on 487-490 with type as ----	2
Double peaks	1
RIKS181301A057A	5
Wild-Type	1
|GGGAGATG -> -------- on 488-495 with type as --------	4
RIKS181301A064A	7
|GTAGGGGGAGATGCA -> --------------- on 483-497 with type as ---------------	3
|AGGGGGAGATG -> ----------- on 485-495 with type as -----------;A -> - on 497-497 with type as -	1
|GC -> -- on 495-496 with type as --	2
Double peaks	1
RIKS181301A065A	6
|GGGAGATG -> -------- on 488-495 with type as --------	3
|GGGGGAGATG -> ---------- on 486-495 with type as ----------	3
RIKS181301A070A	8
|GGGGAGATG -> --------- on 487-495 with type as ---------	3
|GGGAGATGCA -> ---------- on 488-497 with type as ----------	5
RIKS181302A071A	8
|CAGTAGGGGGAGATGCA -> ----------------- on 481-497 with type as -----------------	4
|Unaligned fragments on contig 1 bp. which was on 438 to 502 on the reference.	4
RIKS181302A077A	7
|GGGGAGATGCATATCTA -> ----------------- on 487-503 with type as -----------------	1
|GGGGGAGATG -> ---------- on 486-495 with type as ----------	4
|AGGGGGA -> ------- on 485-491 with type as -------;A -> T on 493-493 with type as v;G -> - on 495-495 with type as -;C -> T on 496-496 with type as i	1
|Unaligned fragments on contig 1 bp. which was on 439 to 501 on the reference.	1
RIKS181302A118A	7
|GGGGAGATGC -> ---------- on 487-496 with type as ----------	2
|GGGGAG -> ------ on 487-492 with type as ------	5
RIKS181302A131A	7
|GGGGAGATGC -> ---------- on 487-496 with type as ----------	2
|GAGATG -> ------ on 490-495 with type as ------	5
RIKS181303A001A	7
Wild-Type	4
|AGGGGGAGATGCA -> ------------- on 485-497 with type as -------------	3
RIKS181303A014A	6
|GGGGAGATGC -> ---------- on 487-496 with type as ----------	1
|GGGAGATG -> -------- on 488-495 with type as --------	4
Double peaks	1
(blank)
Grand Total	221

## Sheet: PCR pro seq results
Plant ID	Editing Assay call	Sample	Manual Confirmed	CDZKYK1876-01 24259-SR	Allele1	Allele2	A1 name	A1 seq	A2 name	A2 seq	Same with colony seq?	Type
RiceWT	2	RiceWT-D2well.24259-SR	WT	ND
RIKS180900A008A	1	RIKS180900A008A.24259-SR	WT	ND
RIKS180900A009A	0	RIKS180900A009A.24259-SR	+	[GT][AC][AG][CT]AT[AC]T[CA][AT][CA][CA][CT][CT]T[GT]T[GT]TTTTTTTT[TC]T[CT][GT]	CCACTTTTGGTGGTGTACAG-----------GCATATCTAACCTTTGTTTTTTTTTTCTTG (deletion)	CCACTTTTGGTGGTGTACAGTA---------GCATATCTAACCTTTGTTTTTTTTTTCT (deletion)	RIKS180900A009A-A1	CCACTTTTGGTGGTGTACAGGCATATCTAACCTT	RIKS180900A009A-A2	CCACTTTTGGTGGTGTACAGTAGCATATCTAACCTT	Yes	Biallelic
RIKS180900A014A	0	RIKS180900A014A.24259-SR	+	[CA][AG][GT]AT[AC]T[CA][AT][AC][CA][CT][CT]T[GT]T[GT]TTTTTTTT[TC]T[CT][GT]T	CACTTTTGGTGGTGTACAGT-----------CATATCTAACCTTTGTTTTTTTTTTCTTGT (deletion)	CACTTTTGGTGGTGTACAGTAGG---------ATATCTAACCTTTGTTTTTTTTTTCTT (deletion)	RIKS180900A014A-A1	CACTTTTGGTGGTGTACAGTCATATCTAACCTTT	RIKS180900A014A-A2	CACTTTTGGTGGTGTACAGTAGGATATCTAACCTTT	No	Biallelic
RIKS180900A030A	0	RIKS180900A030A.24259-SR	+	[GC][CT]AT[CA]T[CA][AT][CA][CA][CT][CT]T[GT]T[GT]TTTTTTTT[TC]T[CT][GT]TG	CTTTTGGTGGTGTACAGTAG--------GCATATCTAACCTTTGTTTTTTTTTTCTTG (deletion)	CTTTTGGTGGTGTACAGTAG---------C-TATCTAACCTTTGTTTTTTTTTTCTTGTG (deletion)	RIKS180900A030A-A1	CTTTTGGTGGTGTACAGTAGGCATATCTAACCTTTGT	RIKS180900A030A-A2	CTTTTGGTGGTGTACAGTAGCTATCTAACCTTTGT	No	Biallelic
RIKS180900A034A	2	RIKS180900A034A.24259-SR	WT	ND
RIKS180900A042A	1	RIKS180900A042A.24259-SR	+	[TG]AT[CG][CT]A[AT][AC][CT][CT]T[TA][GA][TC][CT]TTT[GT]TTTT[CT]TT[GT]T[GT]C	GGTGGTGTACAGTAGGGGGAGATGCATATCTAACCTTTGTTTTTTTTTTC (WT)	GGTGGTGTACAGTAGGGGGA------TATCTAACCTTTGTTTTTTTTTTCTTGTGC (deletion)	RIKS180900A042A-A1	GGTGGTGTACAGTAGGGGGAGATGCATATCTAACCTTTGTTTTTT	RIKS180900A042A-A2	GGTGGTGTACAGTAGGGGGATATCTAACCTTTGTTTTTT	Yes'	Het
RIKS180900A044A	2	RIKS180900A044A.24259-SR	WT	ND
RIKS180900A050A	2	RIKS180900A050A.24259-SR	WT	ND
RIKS180900A053A	0	RIKS180900A053A.24259-SR	+	[GC][CA][TA][AT][AT][CT][CT][TA]A[AC]C[CT]TT[GT][GT]TTTTTTTTT[TC][CT]T[GT][GT]	CTTTTGGTGGTGTACAGTAG--------GCATATCTAACCTTTGTTTTTTTTTTCTTG (deletion)	CTTTTGGTGGTGTACAGTAG---------CATATCTAACCTTTGTTTTTTTTTTCTTGT (deletion)	RIKS180900A053A-A1	CTTTTGGTGGTGTACAGTAGGCATATCTAACCTTTGT	RIKS180900A053A-A2	CTTTTGGTGGTGTACAGTAGCATATCTAACCTTTGT	Yes	Biallelic
RIKS180901A006A	2	RIKS180901A006A.24259-SR	WT	ND
RIKS180901A008A	2	RIKS180901A008A.24259-SR	+	[AC][AG][AT][AT][GT]C[TA][TA]A[TC]CT[TA][TA][GC][CT]TTT[GT]TTTTT[TC]TT[GT]T	TGGTGGTGTACAGTAGGGGGAGATGCATATCTAACCTTTGTTTTTTTTTT (WT)	TGGTGGTGTACAGTAGGGGG-----CATATCTAACCTTTGTTTTTTTTTTCTTGT (deletion)	RIKS180901A008A-A1	TGGTGGTGTACAGTAGGGGGAGATGCATATCTAACCTTTGTTTTT	RIKS180901A008A-A2	TGGTGGTGTACAGTAGGGGGCATATCTAACCTTTGTTTTT	Yes'	Het
RIKS180901A022A	0	RIKS180901A022A.24259-SR	+	[TG][CG][GT][AC][AT][CT][CT][GT]TT[GT]TTTTTTT[TC]TT[GC]T[TG][GC]T[GT][GC][AT]T	ACTTTTGGTGGTGTACAGTA--------------TCTAACCTTTGTTTTTTTTTTCTTGTGCTT (deletion)	ACTTTTGGTGGTGTACAGTAGGG-----------------CTTTGTTTTTTTTTTCTTGTGCTTGAT (deletion)	RIKS180901A022A-A1	ACTTTTGGTGGTGTACAGTATCTAACCTTTG	RIKS180901A022A-A2	ACTTTTGGTGGTGTACAGTAGGGCTTTG	Yes	Biallelic
RIKS180901A023A	2	RIKS180901A023A.24259-SR	WT	ND
RIKS180901A025A	0	RIKS180901A025A.24259-SR	+	[AG][TG][AC][TA][CT][AT][TA][CA][CT][CA][AT][TC][CT][GT]TT[GT]TTTTTTT[TC]TT[GC]T[TG]	CTTTTGGTGGTGTACAGTAG----------ATATCTAACCTTTGTTTTTTTTTTCTTGTG (deletion)	CTTTTGGTGGTGTACAGTAGG-------GCATATCTAACCTTTGTTTTTTTTTTCTT (deletion)	RIKS180901A025A-A1	CTTTTGGTGGTGTACAGTAGATATCTAACCTTTGT	RIKS180901A025A-A2	CTTTTGGTGGTGTACAGTAGGGCATATCTAACCTTTGT	Yes	Biallelic
RIKS180901A033A	0	RIKS180901A033A.24259-SR	+	[TG][AT][AT][CG]T[CA]A[TC][CA]T[CT]T[GA][AT][CT][CT]TTT[GT]TTT[TC]TT[TG]T[TG][TC]	TCCACTTTTGGTGGTGTACA---------------TATCTAACCTTTGTTTTTTTTTTCTTGTGC (deletion)	TCCACTTTTGGTGGTGTACAGTAGT--------CATATCTAACCTTTGTTTTTTTTTT (substitution and deletion)	RIKS180901A033A-A1	TCCACTTTTGGTGGTGTACATATCTAACCT	RIKS180901A033A-A2	TCCACTTTTGGTGGTGTACAGTAGTCATATCTAACCT	Yes	Biallelic
RIKS180901A034A	0	RIKS180901A034A.24259-SR	+	[AC][CG][GT][TC][TA][GT][AT]T[CT]T[TA][AT][TC][CT]TT[TC][GT]T[GT]T[TG][TC]TT[TG][TA]T[CA]T	CACTTTTGGTGGTGTACAGT--------------------CCTTTGTTTTTTTTTTCTTGTGCTTGATAT (deletion)	CACTTTTGGTGGTGTACAGTAG--------GCATATCTAACCTTTGTTTTTTTTTTCT (deletion)	RIKS180901A034A-A1	CACTTTTGGTGGTGTACAGTCCTTT	RIKS180901A034A-A2	CACTTTTGGTGGTGTACAGTAGGCATATCTAACCTTT	Yes	Biallelic
RIKS180901A039A	1	RIKS180901A039A.24259-SR	+	[CG][TG][AG][AG]C[CG][AT]T[TG][GC][TA]T[TA]T[TC]T[TA][TA][TC][TC][CT]TTGT[GT][TC]TT[GT]	CTTTTGGTGGTGTACAGTAG--------------CTAACCTTTGTTTTTTTTTTCTTGTGCTTG (deletion)	CTTTTGGTGGTGTACAGTAGGGGGCGATGCATATCTAACCTTTGTTTTTT (substitution)	RIKS180901A039A-A1	CTTTTGGTGGTGTACAGTAGCTAACCTTTGT	RIKS180901A039A-A2	CTTTTGGTGGTGTACAGTAGGGGGCGATGCATATCTAACCTTTGT	No	Chemeric
RIKS180901A046A	0	RIKS180901A046A.24259-SR	+	[GA]TA[TC][CA][TG][AT]A[TC]C[TA]T[AT][GT][CT]T[AT][AT][CT][CT]TTT[GT][CT]TT[GT]T[TG]	GACCCTCCACTTTTGGTGGT-------------------ATATCTAACCTTTGTTTTTTTTTTCTTGTG (deletion)	GACCCTCCACTTTTGGTGGTGTACAGTAT---------CATATCTAACCTTTGTTTTTT (substitution and deletion)	RIKS180901A046A-A1	GACCCTCCACTTTTGGTGGTATATCT	RIKS180901A046A-A2	GACCCTCCACTTTTGGTGGTGTACAGTATCATATCT	Yes	Biallelic
RIKS180901A049A	0	RIKS180901A049A.24259-SR	+	[GC][GA][CT]AT[AC]T[CA][AT][CA][CA][CT][CT]T[GT]T[GT]TTTTTTTT[TC]T[CT][GT]T	CTTTTGGTGGTGTACAGTAG---------CATATCTAACCTTTGTTTTTTTTTTCTTGT (deletion)	CTTTTGGTGGTGTACAGTAGG-------GCATATCTAACCTTTGTTTTTTTTTTCTT (deletion)	RIKS180901A049A-A1	CTTTTGGTGGTGTACAGTAGCATATCTAACCTTTGT	RIKS180901A049A-A2	CTTTTGGTGGTGTACAGTAGGGCATATCTAACCTTTGT	Yes	Biallelic
RIKS180901A061A	1	RIKS180901A061A.24259-SR	+	[AT][TA][AG][TG][CG][TG][AG]A[CG][CA]T[TG][TC][GA]T[TA]T[TC]T[TA][TA][TC][TC]T[CT]T[TG][GT]T[GT]	CCACTTTTGGTGGTGTACAGTAGGGGGAGATGCATATCTAACCTTTGTTT (WT)	CCACTTTTGGTGGTGTACAG-------------ATATCTAACCTTTGTTTTTTTTTTCTTGTG (deletion)	RIKS180901A061A-A1	CCACTTTTGGTGGTGTACAGTAGGGGGAGATGCATATCTAACCTT	RIKS180901A061A-A2	CCACTTTTGGTGGTGTACAGATATCTAACCTT	No	Chemeric
RIKS181300A009A	1 or 2	RIKS181300A009A.24259-SR	WT	ND
RIKS181300A021A	0	RIKS181300A021A.24259-SR	+	[GA][CG]A[CT]AT[CA]T[CA][AT][CA][CA][CT][CT]T[GT]T[GT]TTTTTTTT[TC]T[TC][GT]	CACTTTTGGTGGTGTACAGT----------GCATATCTAACCTTTGTTTTTTTTTTCTTG (deletion)	CACTTTTGGTGGTGTACAGT------AGA--CATATCTAACCTTTGTTTTTTTTTTCT (deletion)	RIKS181300A021A-A1	CACTTTTGGTGGTGTACAGTGCATATCTAACCTTT	RIKS181300A021A-A2	CACTTTTGGTGGTGTACAGTAGACATATCTAACCTTT	Yes	Biallelic
RIKS181301A004A	0	RIKS181301A004A.24259-SR	+	ND			RIKS181301A004A-A1		RIKS181301A004A-A2		Un-decoded	Biallelic
RIKS181301A010A	1	RIKS181301A010A.24259-SR	3 peaks	ND			RIKS181301A010A-A1		RIKS181301A010A-A2		Un-decoded	Chemeric
RIKS181301A021A	0 or 1	RIKS181301A021A.24259-SR	+	[AG][CG][CG][TG][AT][TG][AG]T[TG][CT][TA]T[TA]T[TC]T[TA][CA][TC][TC][GT]T[TG][GC]TT[TG][AT]T[TA]	CTTTTGGTGGTGTACAGTAGGGGGAGATGCATATCTAACCTTTGTTTTTT (WT)	CTTTTGGTGGTGTACAGTAG-----------------ACCTTTGTTTTTTTTTTCTTGTGCTTGATA (deletion)	RIKS181301A021A-A1	CTTTTGGTGGTGTACAGTAGGGGGAGATGCATATCTAACCTTTGT	RIKS181301A021A-A2	CTTTTGGTGGTGTACAGTAGACCTTTGT	Yes'	Chemeric
RIKS181301A039A	1	RIKS181301A039A.24259-SR	+	[TG]A[TG][AC]T[AG][AC][CA][CT][TA]T[TC][GT][TA][TA][TC][TC]TTT[TG]TT[CT]TT[GT][TG][GT][CT]	TTGGTGGTGTACAGTAGGGGGAGATGCATATCTAACCTTTGTTTTTTTTT (WT)	TTGGTGGTGTACAGTAGGGGTATCTAACCTTTGTTTTTTTTTTCTTGGGC (complicated variant)	RIKS181301A039A-A1	TTGGTGGTGTACAGTAGGGGGAGATGCATATCTAACCTTTGTTTT	RIKS181301A039A-A2	TTGGTGGTGTACAGTAGGGGTATCTAACCTTTGTTTTTTTTTTCT	No	Het
RIKS181301A046A	0	RIKS181301A046A.24259-SR	+	[CG][AT][AT][AG][TC][CA]TA[AT]C[CT][TA][AT][TC][CG]TTT[GT]TTTTTT[TC]TT[TG][CT]	TCCACTTTTGGTGGTGTACA---------GATGCATATCTAACCTTTGTTTTTTTTTTC (deletion)	TCCACTTTTGGTGGTGTACACTA-------------ATCTAACCTTTGTTTTTTTTTTCTTGT (substitution and deletion)	RIKS181301A046A-A1	TCCACTTTTGGTGGTGTACAGATGCATATCTAACCT	RIKS181301A046A-A2	TCCACTTTTGGTGGTGTACACTAATCTAACCT	No	Biallelic
RIKS181301A051A	0	RIKS181301A051A.24259-SR	+	[TA]T[AG][TG][AT]T[GT][CT][TA]T[AT]T[CT][CT][TA][AT][GC][CT][GT][TC]T[GT][TG][TA]T[TA]TTT[TC]	CACTTTTGGTGGTGTACAGT-----------------------TTGTTTTTTTTTTCTTGTGCTTGATATTTC (deletion)	CACTTTTGGTGGTGTACAGTAT----AGATGCATATCTAACCTTTGTTTTTTTT (substitution and deletion)	RIKS181301A051A-A1	CACTTTTGGTGGTGTACAGTTT	RIKS181301A051A-A2	CACTTTTGGTGGTGTACAGTATAGATGCATATCTAACCTTT	No'	Biallelic
RIKS181301A057A	1	RIKS181301A057A.24259-SR	+	[CG][AG][TG]A[TG][AC]T[GA][AC][CA][CT][AT]T[CT][GT][TA][TA][TC][CT]TTT[TG]TT[CT]TT[GT]T	TTTTGGTGGTGTACAGTAGGGGGAGATGCATATCTAACCTTTGTTTTTTT (WT)	TTTTGGTGGTGTACAGTAGG--------CATATCTAACCTTTGTTTTTTTTTTCTTGT (deletion)	RIKS181301A057A-A1	TTTTGGTGGTGTACAGTAGGGGGAGATGCATATCTAACCTTTGTT	RIKS181301A057A-A2	TTTTGGTGGTGTACAGTAGGCATATCTAACCTTTGTT	Yes	Het
RIKS181301A064A	0	RIKS181301A064A.24259-SR	+	[TG][AT][AT]C[GT][GA][AG]CC[AT][AT]T[GA]T[TA]T[TC]T[TA][TA][TC][TC]T[TC]T[GT][GT]T[TG][TC]	TCCACTTTTGGTGGTGTACA---------------TATCTAACCTTTGTTTTTTTTTTCTTGTGC (deletion)	TCCACTTTTGGTGGTGTACAGTACGGGCCAAT--ATATCTAACCTTTGTTTT (substitution and deletion)	RIKS181301A064A-A1	TCCACTTTTGGTGGTGTACATATCTAACCT	RIKS181301A064A-A2	TCCACTTTTGGTGGTGTACAGTACGGGCCAATATATCTAACCT	No	Chemeric
RIKS181301A065A	0	RIKS181301A065A.24259-SR	+	[CG][GA][TC]AT[CA]T[CA][AT][CA][CA][CT][CT]T[GT]T[GT]TTTTTTTT[TC]T[CT][GT]T	ACTTTTGGTGGTGTACAGTA----------CATATCTAACCTTTGTTTTTTTTTTCTTGT (deletion)	ACTTTTGGTGGTGTACAGTAG--------GCATATCTAACCTTTGTTTTTTTTTTCTT (deletion)	RIKS181301A065A-A1	ACTTTTGGTGGTGTACAGTACATATCTAACCTTTG	RIKS181301A065A-A2	ACTTTTGGTGGTGTACAGTAGGCATATCTAACCTTTG	Yes	Biallelic
RIKS181301A070A	0	RIKS181301A070A.24259-SR	+	[GC][TA][AT][AT][CT][CT][AT]A[AC]C[CT]TT[GT][GT]TTTTTTTTT[TC][CT]T[GT][GT][GT]	CTTTTGGTGGTGTACAGTAG---------CATATCTAACCTTTGTTTTTTTTTTCTTGT (deletion)	CTTTTGGTGGTGTACAGTAGG----------TATCTAACCTTTGTTTTTTTTTTCTTGTG (deletion)	RIKS181301A070A-A1	CTTTTGGTGGTGTACAGTAGCATATCTAACCTTTGT	RIKS181301A070A-A2	CTTTTGGTGGTGTACAGTAGGTATCTAACCTTTGT	Yes	Biallelic
RIKS181302A005A	2	RIKS181302A005A.24259-SR	WT	ND
RIKS181302A009A	2	RIKS181302A009A.24259-SR	WT	ND
RIKS181302A071A	0	RIKS181302A071A.24259-SR	+	ND			RIKS181302A071A-A1		RIKS181302A071A-A2		Un-decoded	Biallelic	Large deletion
RIKS181302A077A	0	RIKS181302A077A.24259-SR	+	[GA][CT][AT]TAT[CA]T[CA][AT][CA][CA][CT][CT]T[GT]T[GT]TTTTTTTT[TC]T[CT][GT]	CACTTTTGGTGGTGTACAGT----------GCATATCTAACCTTTGTTTTTTTTTTCTTG (deletion)	CACTTTTGGTGGTGTACAGTATTT--------ATATCTAACCTTTGTTTTTTTTTTCT (substitution and deletion)	RIKS181302A077A-A1	CACTTTTGGTGGTGTACAGTGCATATCTAACCTTT	RIKS181302A077A-A2	CACTTTTGGTGGTGTACAGTATTTATATCTAACCTTT	No	Chemeric
RIKS181302A118A	0	RIKS181302A118A.24259-SR	+	AT[GA][CT][CA]TA[AT]C[CT][AT][TA][TC][GC]TTT[GT]TTTTTT[TC]TT[GT][CT][GT][TC][GT]	CTTTTGGTGGTGTACAGTAG--------ATGCATATCTAACCTTTGTTTTTTTTTTCTTG (insertion and deletion)	CTTTTGGTGGTGTACAGTAG------------ATATCTAACCTTTGTTTTTTTTTTCTTGTGCT (deletion)	RIKS181302A118A-A1	CTTTTGGTGGTGTACAGTAGATGCATATCTAACCTTT	RIKS181302A118A-A2	CTTTTGGTGGTGTACAGTAGATATCTAACCTTT	Yes	Biallelic
RIKS181302A131A	0	RIKS181302A131A.24259-SR	+	[AG][TG][AG][TC][CA]TA[AT]C[CT][TA][TA][TC][GC]TTT[TG]TTTTTT[CT]TT[GT][CT][GT]	CTTTTGGTGGTGTACAGTAG------ATGCATATCTAACCTTTGTTTTTTTTTTCT (deletion)	CTTTTGGTGGTGTACAGTAGGG----------ATCTAACCTTTGTTTTTTTTTTCTTGTG (deletion)	RIKS181302A131A-A1	CTTTTGGTGGTGTACAGTAGATGCATATCTAACCTTTGT	RIKS181302A131A-A2	CTTTTGGTGGTGTACAGTAGGGATCTAACCTTTGT	No	Biallelic
RIKS181303A001A	1	RIKS181303A001A.24259-SR	+	[TA]A[TG][CG][TG][AG]A[CG][CA]T[TG][TC][GA]T[TA]T[TC]T[TA][TA][TC][TC]T[TC]T[TG][GT]T[GT][CT]	CACTTTTGGTGGTGTACAGT-------------TATCTAACCTTTGTTTTTTTTTTCTTGTGC (deletion)	CACTTTTGGTGGTGTACAGTAAGGGGAGATGCATATCTAACCTTTGTTTT (substitution)	RIKS181303A001A-A1	CACTTTTGGTGGTGTACAGTTATCTAACCTTT	RIKS181303A001A-A2	CACTTTTGGTGGTGTACAGTAAGGGGAGATGCATATCTAACCTTT	No	Het
RIKS181303A006A	2	RIKS181303A006A.24259-SR	WT	ND
RIKS181303A014A	0	RIKS181303A014A.24259-SR	Hom deletion: GGGAGATG	ND	cctccacttttggtggtgtacagtagg--------catatctaacctttgtttttttttt		RIKS181303A014A-A	cctccacttttggtggtgtacagtaggcatatctaac			No'	Biallelic
RIKS181303A121A	2	RIKS181303A121A.24259-SR	WT	ND

## Sheet: PCR pro
RIKS180900A009A-A1	CCACTTTTGGTGGTGTACAGGCATATCTAACCTT
RIKS180900A014A-A1	CACTTTTGGTGGTGTACAGTCATATCTAACCTTT
RIKS180900A030A-A1	CTTTTGGTGGTGTACAGTAGGCATATCTAACCTTTGT
RIKS180900A042A-A1	GGTGGTGTACAGTAGGGGGAGATGCATATCTAACCTTTGTTTTTT
RIKS180900A053A-A1	CTTTTGGTGGTGTACAGTAGGCATATCTAACCTTTGT
RIKS180901A008A-A1	TGGTGGTGTACAGTAGGGGGAGATGCATATCTAACCTTTGTTTTT
RIKS180901A022A-A1	ACTTTTGGTGGTGTACAGTATCTAACCTTTG
RIKS180901A025A-A1	CTTTTGGTGGTGTACAGTAGATATCTAACCTTTGT
RIKS180901A033A-A1	TCCACTTTTGGTGGTGTACATATCTAACCT
RIKS180901A034A-A1	CACTTTTGGTGGTGTACAGTCCTTT
RIKS180901A039A-A1	CTTTTGGTGGTGTACAGTAGCTAACCTTTGT
RIKS180901A046A-A1	GACCCTCCACTTTTGGTGGTATATCT
RIKS180901A049A-A1	CTTTTGGTGGTGTACAGTAGCATATCTAACCTTTGT
RIKS180901A061A-A1	CCACTTTTGGTGGTGTACAGTAGGGGGAGATGCATATCTAACCTT
RIKS181300A021A-A1	CACTTTTGGTGGTGTACAGTGCATATCTAACCTTT
RIKS181301A021A-A1	CTTTTGGTGGTGTACAGTAGGGGGAGATGCATATCTAACCTTTGT
RIKS181301A039A-A1	TTGGTGGTGTACAGTAGGGGGAGATGCATATCTAACCTTTGTTTT
RIKS181301A046A-A1	TCCACTTTTGGTGGTGTACAGATGCATATCTAACCT
RIKS181301A051A-A1	CACTTTTGGTGGTGTACAGTTT
RIKS181301A057A-A1	TTTTGGTGGTGTACAGTAGGGGGAGATGCATATCTAACCTTTGTT
RIKS181301A064A-A1	TCCACTTTTGGTGGTGTACATATCTAACCT
RIKS181301A065A-A1	ACTTTTGGTGGTGTACAGTACATATCTAACCTTTG
RIKS181301A070A-A1	CTTTTGGTGGTGTACAGTAGCATATCTAACCTTTGT
RIKS181302A077A-A1	CACTTTTGGTGGTGTACAGTGCATATCTAACCTTT
RIKS181302A118A-A1	CTTTTGGTGGTGTACAGTAGATGCATATCTAACCTTT
RIKS181302A131A-A1	CTTTTGGTGGTGTACAGTAGATGCATATCTAACCTTTGT
RIKS181303A001A-A1	CACTTTTGGTGGTGTACAGTTATCTAACCTTT
RIKS181303A014A-A	cctccacttttggtggtgtacagtaggcatatctaac
RIKS180900A009A-A2	CCACTTTTGGTGGTGTACAGTAGCATATCTAACCTT
RIKS180900A014A-A2	CACTTTTGGTGGTGTACAGTAGGATATCTAACCTTT
RIKS180900A030A-A2	CTTTTGGTGGTGTACAGTAGCTATCTAACCTTTGT
RIKS180900A042A-A2	GGTGGTGTACAGTAGGGGGATATCTAACCTTTGTTTTTT
RIKS180900A053A-A2	CTTTTGGTGGTGTACAGTAGCATATCTAACCTTTGT
RIKS180901A008A-A2	TGGTGGTGTACAGTAGGGGGCATATCTAACCTTTGTTTTT
RIKS180901A022A-A2	ACTTTTGGTGGTGTACAGTAGGGCTTTG
RIKS180901A025A-A2	CTTTTGGTGGTGTACAGTAGGGCATATCTAACCTTTGT
RIKS180901A033A-A2	TCCACTTTTGGTGGTGTACAGTAGTCATATCTAACCT
RIKS180901A034A-A2	CACTTTTGGTGGTGTACAGTAGGCATATCTAACCTTT
RIKS180901A039A-A2	CTTTTGGTGGTGTACAGTAGGGGGCGATGCATATCTAACCTTTGT
RIKS180901A046A-A2	GACCCTCCACTTTTGGTGGTGTACAGTATCATATCT
RIKS180901A049A-A2	CTTTTGGTGGTGTACAGTAGGGCATATCTAACCTTTGT
RIKS180901A061A-A2	CCACTTTTGGTGGTGTACAGATATCTAACCTT
RIKS181300A021A-A2	CACTTTTGGTGGTGTACAGTAGACATATCTAACCTTT
RIKS181301A021A-A2	CTTTTGGTGGTGTACAGTAGACCTTTGT
RIKS181301A039A-A2	TTGGTGGTGTACAGTAGGGGTATCTAACCTTTGTTTTTTTTTTCT
RIKS181301A046A-A2	TCCACTTTTGGTGGTGTACACTAATCTAACCT
RIKS181301A051A-A2	CACTTTTGGTGGTGTACAGTATAGATGCATATCTAACCTTT
RIKS181301A057A-A2	TTTTGGTGGTGTACAGTAGGCATATCTAACCTTTGTT
RIKS181301A064A-A2	TCCACTTTTGGTGGTGTACAGTACGGGCCAATATATCTAACCT
RIKS181301A065A-A2	ACTTTTGGTGGTGTACAGTAGGCATATCTAACCTTTG
RIKS181301A070A-A2	CTTTTGGTGGTGTACAGTAGGTATCTAACCTTTGT
RIKS181302A077A-A2	CACTTTTGGTGGTGTACAGTATTTATATCTAACCTTT
RIKS181302A118A-A2	CTTTTGGTGGTGTACAGTAGATATCTAACCTTT
RIKS181302A131A-A2	CTTTTGGTGGTGTACAGTAGGGATCTAACCTTTGT
RIKS181303A001A-A2	CACTTTTGGTGGTGTACAGTAAGGGGAGATGCATATCTAACCTTT

## Sheet: Data_Source
Sample	clone	genotype	genotype org
RIKS180900A009A	RIKS180900A009A-1.24259-SR_R18.5045194.B180713_A6001.seq_align.txt	|TAGGGGGAGAT -> ----------- on 484-494 with type as -----------
RIKS180900A009A	RIKS180900A009A-4.24259-SR_R18.5045194.B180713_A6004.seq_align.txt	|GGGGAGATG -> --------- on 487-495 with type as ---------
RIKS180900A009A	RIKS180900A009A-5.24259-SR_R18.5045194.B180713_A6005.seq_align.txt	|GGGGAGATG -> --------- on 487-495 with type as ---------
RIKS180900A009A	RIKS180900A009A-6.24259-SR_R18.5045194.B180713_A6006.seq_align.txt	|TAGGGGGAGAT -> ----------- on 484-494 with type as -----------
RIKS180900A009A	RIKS180900A009A-7.24259-SR_R18.5045194.B180713_A6007.seq_align.txt	|GGGGAGATG -> --------- on 487-495 with type as ---------
RIKS180900A009A	RIKS180900A009A-8.24259-SR_R18.5045194.B180713_A6008.seq_align.txt	|TAGGGGGAGAT -> ----------- on 484-494 with type as -----------
RIKS180900A014A	RIKS180900A014A-1.24259-SR_R18.5045194.B180713_A6009.seq_align.txt	|GGGAGATGC -> --------- on 488-496 with type as ---------
RIKS180900A014A	RIKS180900A014A-2.24259-SR_R18.5045194.B180713_A6010.seq_align.txt	|GGGAGATGC -> --------- on 488-496 with type as ---------
RIKS180900A014A	RIKS180900A014A-3.24259-SR_R18.5045194.B180713_A6011.seq_align.txt	|GGGAGATGC -> --------- on 488-496 with type as ---------
RIKS180900A014A	RIKS180900A014A-5.24259-SR_R18.5045194.B180713_A6013.seq_align.txt	|GGGAGATGC -> --------- on 488-496 with type as ---------
RIKS180900A014A	RIKS180900A014A-6.24259-SR_R18.5045194.B180713_A6014.seq_align.txt	|GGGAGATGC -> --------- on 488-496 with type as ---------	|GGGAGATGC -> --------- on 488-496 with type as ---------;T -> - on 511-511 with type as -
RIKS180900A014A	RIKS180900A014A-7.24259-SR_R18.5045194.B180713_A6015.seq_align.txt	|GGGAGATGC -> --------- on 488-496 with type as ---------
RIKS180900A030A	RIKS180900A030A-1.24259-SR_R18.5045194.B180713_A6017.seq_align.txt	|GGGGAGAT -> -------- on 487-494 with type as --------;G -> C on 495-495 with type as v	|GGGGAGAT -> -------- on 487-494 with type as --------;G -> C on 495-495 with type as v;- -> T on 510-510 with type as -
RIKS180900A030A	RIKS180900A030A-2.24259-SR_R18.5045194.B180713_A6018.seq_align.txt	|GGGAGATGCA -> ---------- on 488-497 with type as ----------	|GGGAGATGCA -> ---------- on 488-497 with type as ----------;- -> T on 510-510 with type as -
RIKS180900A030A	RIKS180900A030A-4.24259-SR_R18.5045194.B180713_A6020.seq_align.txt	|GGGGAGAT -> -------- on 487-494 with type as --------;G -> C on 495-495 with type as v
RIKS180900A030A	RIKS180900A030A-5.24259-SR_R18.5045194.B180713_A6021.seq_align.txt	|GGGGAGAT -> -------- on 487-494 with type as --------;G -> C on 495-495 with type as v	|GGGGAGAT -> -------- on 487-494 with type as --------;G -> C on 495-495 with type as v;- -> T on 510-510 with type as -
RIKS180900A030A	RIKS180900A030A-6.24259-SR_R18.5045194.B180713_A6022.seq_align.txt	|GGGAGATGCA -> ---------- on 488-497 with type as ----------	|GGGAGATGCA -> ---------- on 488-497 with type as ----------;- -> T on 510-510 with type as -
RIKS180900A030A	RIKS180900A030A-7.24259-SR_R18.5045194.B180713_A6023.seq_align.txt	|GGGAGATGCA -> ---------- on 488-497 with type as ----------
RIKS180900A030A	RIKS180900A030A-8.24259-SR_R18.5045194.B180713_A6024.seq_align.txt	|GGGGAGAT -> -------- on 487-494 with type as --------;G -> C on 495-495 with type as v	|A -> - on 388-388 with type as -;GGGGAGAT -> -------- on 487-494 with type as --------;G -> C on 495-495 with type as v;- -> T on 510-510 with type as -
RIKS180900A042A	RIKS180900A042A-1.24259-SR_R18.5045194.B180713_A6025.seq_align.txt	Double peaks	|G -> A on 733-733 with type as i;T -> G on 779-779 with type as v;T -> G on 821-821 with type as v
RIKS180900A042A	RIKS180900A042A-4.24259-SR_R18.5045194.B180713_A6028.seq_align.txt	|GATGCA -> ------ on 492-497 with type as ------
RIKS180900A042A	RIKS180900A042A-6.24259-SR_R18.5045194.B180713_A6030.seq_align.txt	|G -> T on 492-492 with type as v
RIKS180900A042A	RIKS180900A042A-7.24259-SR_R18.5045194.B180713_A6031.seq_align.txt	Double peaks	|GGGGGAGATGCATATCTA -> ------------------ on 486-503 with type as ------------------
RIKS180900A042A	RIKS180900A042A-8.24259-SR_R18.5045194.B180713_A6032.seq_align.txt	|GATGCA -> ------ on 492-497 with type as ------
RIKS180900A053A	RIKS180900A053A-1.24259-SR_R18.5045194.B180713_A6033.seq_align.txt	|GGGGAGATG -> --------- on 487-495 with type as ---------	|GGGGAGATG -> --------- on 487-495 with type as ---------;- -> T on 510-510 with type as -
RIKS180900A053A	RIKS180900A053A-2.24259-SR_R18.5045194.B180713_A6034.seq_align.txt	|GGGGAGATG -> --------- on 487-495 with type as ---------
RIKS180900A053A	RIKS180900A053A-3.24259-SR_R18.5045194.B180713_A6035.seq_align.txt	|GGGGAGATG -> --------- on 487-495 with type as ---------
RIKS180900A053A	RIKS180900A053A-4.24259-SR_R18.5045194.B180713_A6036.seq_align.txt	|GGGGAGATG -> --------- on 487-495 with type as ---------
RIKS180900A053A	RIKS180900A053A-5.24259-SR_R18.5045194.B180713_A6037.seq_align.txt	|GGGGAGATG -> --------- on 487-495 with type as ---------
RIKS180900A053A	RIKS180900A053A-6.24259-SR_R18.5045194.B180713_A6038.seq_align.txt	|GGGAGATG -> -------- on 488-495 with type as --------	|GGGAGATG -> -------- on 488-495 with type as --------;- -> T on 510-510 with type as -
RIKS180900A053A	RIKS180900A053A-8.24259-SR_R18.5045194.B180713_A6040.seq_align.txt	|GGGGAGATG -> --------- on 487-495 with type as ---------	|GGGGAGATG -> --------- on 487-495 with type as ---------;- -> T on 510-510 with type as -
RIKS180901A008A	RIKS180901A008A-3.24259-SR_R18.5045194.B180713_A6043.seq_align.txt	|AGATG -> ----- on 491-495 with type as -----
RIKS180901A008A	RIKS180901A008A-4.24259-SR_R18.5045194.B180713_A6044.seq_align.txt	|AGATG -> ----- on 491-495 with type as -----	|AGATG -> ----- on 491-495 with type as -----;-- -> TT on 520-520 with type as --
RIKS180901A008A	RIKS180901A008A-6.24259-SR_R18.5045194.B180713_A6046.seq_align.txt	|GGGGGAGATGCA -> ------------ on 486-497 with type as ------------
RIKS180901A008A	RIKS180901A008A-7.24259-SR_R18.5045194.B180713_A6047.seq_align.txt	Wild-Type	|-- -> TT on 520-520 with type as --
RIKS180901A008A	RIKS180901A008A-8.24259-SR_R18.5045194.B180713_A6048.seq_align.txt	|AGATG -> ----- on 491-495 with type as -----	|A -> - on 388-388 with type as -;AGATG -> ----- on 491-495 with type as -----
RIKS180901A022A	RIKS180901A022A-1.24259-SR_R18.5045194.B180713_A6049.seq_align.txt	|GGAGATGCATATCTAAC -> ----------------- on 489-505 with type as -----------------
RIKS180901A022A	RIKS180901A022A-2.24259-SR_R18.5045194.B180713_A6050.seq_align.txt	|GGAGATGCATATCTAAC -> ----------------- on 489-505 with type as -----------------
RIKS180901A022A	RIKS180901A022A-3.24259-SR_R18.5045194.B180713_A6051.seq_align.txt	|GGGGGAGATGCATA -> -------------- on 486-499 with type as --------------
RIKS180901A022A	RIKS180901A022A-4.24259-SR_R18.5045194.B180713_A6052.seq_align.txt	|GGGGGAGATGCATA -> -------------- on 486-499 with type as --------------
RIKS180901A022A	RIKS180901A022A-5.24259-SR_R18.5045194.B180713_A6053.seq_align.txt	|GGAGATGCATATCTAAC -> ----------------- on 489-505 with type as -----------------	|GGAGATG -> ------- on 489-495 with type as -------;A -> - on 497-497 with type as -;A -> - on 499-499 with type as -;C -> - on 501-501 with type as -;A -> G on 503-503 with type as i;ACC -> --- on 504-506 with type as ---;GT -> -- on 510-511 with type as --
RIKS180901A022A	RIKS180901A022A-6.24259-SR_R18.5045194.B180713_A6054.seq_align.txt	|GGAGATGCATATCTAAC -> ----------------- on 489-505 with type as -----------------
RIKS180901A022A	RIKS180901A022A-8.24259-SR_R18.5045194.B180713_A6056.seq_align.txt	|GGAGATGCATATCTAAC -> ----------------- on 489-505 with type as -----------------
RIKS180901A025A	RIKS180901A025A-1.24259-SR_R18.5045194.B180713_A6057.seq_align.txt	|GGAGATG -> ------- on 489-495 with type as -------	|GGAGATG -> ------- on 489-495 with type as -------;- -> T on 520-520 with type as -
RIKS180901A025A	RIKS180901A025A-2.24259-SR_R18.5045194.B180713_A6058.seq_align.txt	|GGGGAGATGC -> ---------- on 487-496 with type as ----------	|GGGG -> ---- on 487-490 with type as ----;G -> T on 492-492 with type as v;GC -> CT on 495-496 with type as vi;TATC -> ACCT on 498-501 with type as vvii;AACC -> TGTT on 503-506 with type as viii;G -> T on 510-510 with type as v
RIKS180901A025A	RIKS180901A025A-3.24259-SR_R18.5045194.B180713_A6059.seq_align.txt	|GGGGAGATGC -> ---------- on 487-496 with type as ----------
RIKS180901A025A	RIKS180901A025A-4.24259-SR_R18.5045194.B180713_A6060.seq_align.txt	|GGAGATG -> ------- on 489-495 with type as -------	|A -> - on 388-388 with type as -;GGAGATG -> ------- on 489-495 with type as -------
RIKS180901A025A	RIKS180901A025A-5.24259-SR_R18.5045194.B180713_A6061.seq_align.txt	|GGGGAGATGC -> ---------- on 487-496 with type as ----------
RIKS180901A025A	RIKS180901A025A-7.24259-SR_R18.5045194.B180713_A6063.seq_align.txt	|GGAGATG -> ------- on 489-495 with type as -------	|GGAGATG -> ------- on 489-495 with type as -------;- -> T on 520-520 with type as -
RIKS180901A025A	RIKS180901A025A-8.24259-SR_R18.5045194.B180713_A6064.seq_align.txt	|GGAGATG -> ------- on 489-495 with type as -------	|GGAGATG -> ------- on 489-495 with type as -------;- -> T on 520-520 with type as -
RIKS180901A033A	RIKS180901A033A-1.24259-SR_R18.5045194.B180713_A6065.seq_align.txt	|GTAGGGGGAGATGCA -> --------------- on 483-497 with type as ---------------
RIKS180901A033A	RIKS180901A033A-3.24259-SR_R18.5045194.B180713_A6067.seq_align.txt	|GTAGGGGGAGATGCA -> --------------- on 483-497 with type as ---------------
RIKS180901A033A	RIKS180901A033A-5.24259-SR_R18.5045194.B180713_A6069.seq_align.txt	|GTAGGGGGAGATGCA -> --------------- on 483-497 with type as ---------------
RIKS180901A033A	RIKS180901A033A-6.24259-SR_R18.5045194.B180713_A6070.seq_align.txt	Double peaks	|T -> C on 250-250 with type as i;T -> C on 256-256 with type as i;T -> A on 259-259 with type as v;GG -> TC on 263-264 with type as vv;T -> G on 273-273 with type as v;A -> G on 275-275 with type as i;AAG -> GGT on 280-282 with type as iiv;T -> A on 287-287 with type as v;CA -> TC on 291-292 with type as iv;T -> C on 294-294 with type as i;G -> T on 297-297 with type as v;GGA -> TTG on 305-307 w…
RIKS180901A033A	RIKS180901A033A-7.24259-SR_R18.5045194.B180713_A6071.seq_align.txt	|GGGGAGA -> ------- on 487-493 with type as -------;G -> - on 495-495 with type as -
RIKS180901A033A	RIKS180901A033A-8.24259-SR_R18.5045194.B180713_A6072.seq_align.txt	|GTAGGGGGAGATGCA -> --------------- on 483-497 with type as ---------------
RIKS180901A034A	RIKS180901A034A-1.24259-SR_R18.5045194.B180713_A6073.seq_align.txt	|AGGGGGAGATGCATATCTAA -> -------------------- on 485-504 with type as --------------------
RIKS180901A034A	RIKS180901A034A-2.24259-SR_R18.5045194.B180713_A6074.seq_align.txt	|AGGGGGAGATGCATATCTAA -> -------------------- on 485-504 with type as --------------------
RIKS180901A034A	RIKS180901A034A-3.24259-SR_R18.5045194.B180713_A6075.seq_align.txt	|GGGAGATG -> -------- on 488-495 with type as --------
RIKS180901A034A	RIKS180901A034A-4.24259-SR_R18.5045194.B180713_A6076.seq_align.txt	|AGGGGGAGATGCATATCTAA -> -------------------- on 485-504 with type as --------------------	|AGGGGGAGATGCATATCTAA -> -------------------- on 485-504 with type as --------------------;- -> T on 510-510 with type as -
RIKS180901A034A	RIKS180901A034A-5.24259-SR_R18.5045194.B180713_A6077.seq_align.txt	|GGGAGATG -> -------- on 488-495 with type as --------
RIKS180901A034A	RIKS180901A034A-6.24259-SR_R18.5045194.B180713_A6078.seq_align.txt	|GGGAGATG -> -------- on 488-495 with type as --------
RIKS180901A034A	RIKS180901A034A-7.24259-SR_R18.5045194.B180713_A6079.seq_align.txt	|AGGGGGAGATGCATATCTAA -> -------------------- on 485-504 with type as --------------------
RIKS180901A034A	RIKS180901A034A-8.24259-SR_R18.5045194.B180713_A6080.seq_align.txt	|AGGGGGAGATGCATATCTAA -> -------------------- on 485-504 with type as --------------------	|AGGGGGAGATGCATATCTAA -> -------------------- on 485-504 with type as --------------------;- -> T on 510-510 with type as -
RIKS180901A039A	RIKS180901A039A-1.24259-SR_R18.5045194.B180713_A6081.seq_align.txt	|GGGGAGATGCATAT -> -------------- on 487-500 with type as --------------
RIKS180901A039A	RIKS180901A039A-2.24259-SR_R18.5045194.B180713_A6082.seq_align.txt	|GGGAGATG -> -------- on 488-495 with type as --------
RIKS180901A039A	RIKS180901A039A-4.24259-SR_R18.5045194.B180713_A6084.seq_align.txt	|GGGGAGATGCATAT -> -------------- on 487-500 with type as --------------
RIKS180901A039A	RIKS180901A039A-5.24259-SR_R18.5045194.B180713_A6085.seq_align.txt	|GGGGAGATGCATAT -> -------------- on 487-500 with type as --------------	|A -> - on 388-388 with type as -;GGGGAGATGCATAT -> -------------- on 487-500 with type as --------------
RIKS180901A039A	RIKS180901A039A-7.24259-SR_R18.5045194.B180713_A6087.seq_align.txt	|GTAGGGGGAGATGCA -> --------------- on 483-497 with type as ---------------
RIKS180901A039A	RIKS180901A039A-8.24259-SR_R18.5045194.B180713_A6088.seq_align.txt	|GGAGATGCATATCTAA -> ---------------- on 489-504 with type as ---------------	|GGAGATG -> ------- on 489-495 with type as -------;A -> - on 497-497 with type as -;A -> - on 499-499 with type as -;CTAACC -> ------ on 501-506 with type as ------;T -> G on 508-508 with type as v;G -> - on 510-510 with type as -
RIKS180901A046A	RIKS180901A046A-1.24259-SR_R18.5045194.B180713_A6089.seq_align.txt	|GTACAGTAGGGGGAGATGC -> ------------------- on 478-496 with type as -------------------
RIKS180901A046A	RIKS180901A046A-2.24259-SR_R18.5045194.B180713_A6090.seq_align.txt	|GTACAGTAGGGGGAGATGC -> ------------------- on 478-496 with type as -------------------
RIKS180901A046A	RIKS180901A046A-3.24259-SR_R18.5045194.B180713_A6091.seq_align.txt	|GGGGGAGA -> -------- on 486-493 with type as --------;G -> - on 495-495 with type as -
RIKS180901A046A	RIKS180901A046A-4.24259-SR_R18.5045194.B180713_A6092.seq_align.txt	|GTACAGTAGGGGGAGATGC -> ------------------- on 478-496 with type as -------------------
RIKS180901A046A	RIKS180901A046A-5.24259-SR_R18.5045194.B180713_A6093.seq_align.txt	|GTACAGTAGGGGGAGATGC -> ------------------- on 478-496 with type as -------------------
RIKS180901A046A	RIKS180901A046A-6.24259-SR_R18.5045194.B180713_A6094.seq_align.txt	|GTACAGTAGGGGGAGATGC -> ------------------- on 478-496 with type as -------------------
RIKS180901A046A	RIKS180901A046A-7.24259-SR_R18.5045194.B180713_A6095.seq_align.txt	|GTACAGTAGGGGGAGATGC -> ------------------- on 478-496 with type as -------------------
RIKS180901A046A	RIKS180901A046A-8.24259-SR_R18.5045194.B180713_A6096.seq_align.txt	|GGGGGAGA -> -------- on 486-493 with type as --------;G -> - on 495-495 with type as -
RIKS180901A049A	RIKS180901A049A-1.24259-SR_R18.5045194.B180713_A6097.seq_align.txt	|GGGGAGATG -> --------- on 487-495 with type as ---------
RIKS180901A049A	RIKS180901A049A-3.24259-SR_R18.5045212.B180713_A6099.seq_align.txt	|GGGGAGATG -> --------- on 487-495 with type as ---------	|GGGGAGATG -> --------- on 487-495 with type as ---------;C -> - on 855-855 with type as -
RIKS180901A049A	RIKS180901A049A-4.24259-SR_R18.5045212.B180713_A6100.seq_align.txt	|GGGGAGATG -> --------- on 487-495 with type as ---------
RIKS180901A049A	RIKS180901A049A-5.24259-SR_R18.5045212.B180713_A6101.seq_align.txt	|GGGGAGATG -> --------- on 487-495 with type as ---------	|GGGGAGATG -> --------- on 487-495 with type as ---------;- -> T on 510-510 with type as -
RIKS180901A049A	RIKS180901A049A-6.24259-SR_R18.5045212.B180713_A6102.seq_align.txt	|GGAGATG -> ------- on 489-495 with type as -------
RIKS180901A049A	RIKS180901A049A-7.24259-SR_R18.5045212.B180713_A6103.seq_align.txt	|GGAGATG -> ------- on 489-495 with type as -------
RIKS180901A049A	RIKS180901A049A-8.24259-SR_R18.5045212.B180713_A6104.seq_align.txt	|GGAGATG -> ------- on 489-495 with type as -------
RIKS180901A061A	RIKS180901A061A-1.24259-SR_R18.5045212.B180713_A6105.seq_align.txt	|GGGAGATGCAT -> ----------- on 488-498 with type as -----------
RIKS180901A061A	RIKS180901A061A-2.24259-SR_R18.5045212.B180713_A6106.seq_align.txt	|TAGGGGGAGATGC -> ------------- on 484-496 with type as -------------
RIKS180901A061A	RIKS180901A061A-3.24259-SR_R18.5045212.B180713_A6107.seq_align.txt	|TAGGGGGAGATGC -> ------------- on 484-496 with type as -------------
RIKS180901A061A	RIKS180901A061A-4.24259-SR_R18.5045212.B180713_A6108.seq_align.txt	|TAGGGGGAGATGC -> ------------- on 484-496 with type as -------------
RIKS180901A061A	RIKS180901A061A-5.24259-SR_R18.5045212.B180713_A6109.seq_align.txt	|TAGGGGGAGATGC -> ------------- on 484-496 with type as -------------	|TAGGGGGAGATGC -> ------------- on 484-496 with type as -------------;-- -> CA on 96-96 with type as --;Unaligned fragments on contig 390 bp. which was on 106 to 391 on the reference.;Reversed Contig 409 bp. which was on 391 to 813 on the reference.
RIKS180901A061A	RIKS180901A061A-6.24259-SR_R18.5045212.B180713_A6110.seq_align.txt	|GGGAGATGC -> --------- on 488-496 with type as ---------
RIKS180901A061A	RIKS180901A061A-7.24259-SR_R18.5045212.B180713_A6111.seq_align.txt	|TAGGGGGAGATGC -> ------------- on 484-496 with type as -------------
RIKS180901A061A	RIKS180901A061A-8.24259-SR_R18.5045212.B180713_A6112.seq_align.txt	|TAGGGGGAGATGC -> ------------- on 484-496 with type as -------------
RIKS181300A021A	RIKS181300A021A-1.24259-SR_R18.5045212.B180713_A6113.seq_align.txt	|GGGG -> ---- on 487-490 with type as ----;GATG -> ---- on 492-495 with type as ----
RIKS181300A021A	RIKS181300A021A-2.24259-SR_R18.5045212.B180713_A6114.seq_align.txt	|AGGGGGAGAT -> ---------- on 485-494 with type as ----------
RIKS181300A021A	RIKS181300A021A-3.24259-SR_R18.5045212.B180713_A6115.seq_align.txt	|AGGGGGAGAT -> ---------- on 485-494 with type as ----------
RIKS181300A021A	RIKS181300A021A-4.24259-SR_R18.5045212.B180713_A6116.seq_align.txt	|GGGG -> ---- on 487-490 with type as ----;GATG -> ---- on 492-495 with type as ----	|GGGG -> ---- on 487-490 with type as ----;GATG -> ---- on 492-495 with type as ----;- -> T on 520-520 with type as -
RIKS181300A021A	RIKS181300A021A-5.24259-SR_R18.5045212.B180713_A6117.seq_align.txt	|AGGGGGAGAT -> ---------- on 485-494 with type as ----------	|AGGGGGAGAT -> ---------- on 485-494 with type as ----------;T -> - on 511-511 with type as -
RIKS181300A021A	RIKS181300A021A-6.24259-SR_R18.5045212.B180713_A6118.seq_align.txt	|GGGG -> ---- on 487-490 with type as ----;GATG -> ---- on 492-495 with type as ----
RIKS181300A021A	RIKS181300A021A-7.24259-SR_R18.5045212.B180713_A6119.seq_align.txt	|AGGGGGAGAT -> ---------- on 485-494 with type as ----------
RIKS181300A021A	RIKS181300A021A-8.24259-SR_R18.5045212.B180713_A6120.seq_align.txt	|AGGGGGAGAT -> ---------- on 485-494 with type as ----------
RIKS181301A004A	RIKS181301A004A-1.24259-SR_R18.5045212.B180713_A6121.seq_align.txt	|GCATA -> ----- on 495-499 with type as -----;C -> - on 501-501 with type as -
RIKS181301A004A	RIKS181301A004A-2.24259-SR_R18.5045212.B180713_A6122.seq_align.txt	Double peaks	|T -> A on 468-468 with type as v;TTGGTGGTGT -> ---------- on 470-479 with type as ----------;C -> A on 481-481 with type as v;GT -> AA on 483-484 with type as iv;GGGGG -> ----- on 486-490 with type as -----;T -> A on 494-494 with type as v;GC -> -- on 495-496 with type as --;A -> T on 544-544 with type as v;G -> T on 587-587 with type as v;A -> C on 604-604 with type as v;T -> A on 615-615 with …
RIKS181301A004A	RIKS181301A004A-3.24259-SR_R18.5045212.B180713_A6123.seq_align.txt	|CTTTTGGTGGT -> ----------- on 467-477 with type as -----------;T -> A on 479-479 with type as v;C -> A on 481-481 with type as v;GT -> AA on 483-484 with type as iv;G -> A on 486-486 with type as i;GGGG -> ---- on 487-490 with type as ----;T -> A on 494-494 with type as v;GC -> -- on 495-496 with type as --
RIKS181301A004A	RIKS181301A004A-4.24259-SR_R18.5045212.B180713_A6124.seq_align.txt	|CTTTTGGTGGT -> ----------- on 467-477 with type as -----------;T -> A on 479-479 with type as v;C -> A on 481-481 with type as v;GT -> AA on 483-484 with type as iv;G -> A on 486-486 with type as i;GGGG -> ---- on 487-490 with type as ----;T -> A on 494-494 with type as v;GC -> -- on 495-496 with type as --
RIKS181301A004A	RIKS181301A004A-5.24259-SR_R18.5045212.B180713_A6125.seq_align.txt	|CTTTTGGTGGT -> ----------- on 467-477 with type as -----------;T -> A on 479-479 with type as v;C -> A on 481-481 with type as v;GT -> AA on 483-484 with type as iv;G -> A on 486-486 with type as i;GGGG -> ---- on 487-490 with type as ----;T -> A on 494-494 with type as v;GC -> -- on 495-496 with type as --
RIKS181301A004A	RIKS181301A004A-6.24259-SR_R18.5045212.B180713_A6126.seq_align.txt	Double peaks	|CTTTTGGTG -> --------- on 467-475 with type as ---------;TGT -> AAA on 477-479 with type as viv;C -> A on 481-481 with type as v;GT -> AA on 483-484 with type as iv;GGGGG -> ----- on 486-490 with type as -----;T -> A on 494-494 with type as v;GC -> -- on 495-496 with type as --
RIKS181301A004A	RIKS181301A004A-7.24259-SR_R18.5045212.B180713_A6127.seq_align.txt	|GCATA -> ----- on 495-499 with type as -----;C -> - on 501-501 with type as -
RIKS181301A004A	RIKS181301A004A-8.24259-SR_R18.5045212.B180713_A6128.seq_align.txt	|CTTTTGGTGGT -> ----------- on 467-477 with type as -----------;T -> A on 479-479 with type as v;C -> A on 481-481 with type as v;GT -> AA on 483-484 with type as iv;G -> A on 486-486 with type as i;GGGG -> ---- on 487-490 with type as ----;T -> A on 494-494 with type as v;GC -> -- on 495-496 with type as --
RIKS181301A010A	RIKS181301A010A-1.24259-SR_R18.5045212.B180713_A6129.seq_align.txt	|GGGGGAGATGCATAT -> --------------- on 486-500 with type as ---------------
RIKS181301A010A	RIKS181301A010A-2.24259-SR_R18.5045212.B180713_A6130.seq_align.txt	|GGGGAGATG -> --------- on 487-495 with type as ---------
RIKS181301A010A	RIKS181301A010A-3.24259-SR_R18.5045212.B180713_A6131.seq_align.txt	|GGGGAGATG -> --------- on 487-495 with type as ---------
RIKS181301A010A	RIKS181301A010A-5.24259-SR_R18.5045212.B180713_A6133.seq_align.txt	|GGGGAGATG -> --------- on 487-495 with type as ---------	|GGGGAGATG -> --------- on 487-495 with type as ---------;- -> T on 510-510 with type as -
RIKS181301A010A	RIKS181301A010A-7.24259-SR_R18.5045212.B180713_A6135.seq_align.txt	|GGGGAGATG -> --------- on 487-495 with type as ---------
RIKS181301A010A	RIKS181301A010A-8.24259-SR_R18.5045212.B180713_A6136.seq_align.txt	|GGGGAGATGC -> ---------- on 487-496 with type as ----------
RIKS181301A021A	RIKS181301A021A-1.24259-SR_R18.5045212.B180713_A6137.seq_align.txt	Wild-Type	|T -> - on 520-520 with type as -
RIKS181301A021A	RIKS181301A021A-2.24259-SR_R18.5045212.B180713_A6138.seq_align.txt	Double peaks	|AGATGCATATCTAACCT -> ----------------- on 491-507 with type as -----------------;T -> G on 512-512 with type as v;T -> C on 523-523 with type as i;C -> G on 527-527 with type as v;A -> T on 533-533 with type as v;T -> C on 538-538 with type as i;T -> G on 541-541 with type as v;CAC -> GCT on 543-545 with type as vvi;A -> T on 552-552 with type as v;A -> C on 554-554 with type as v;CA -> TT on 55…
RIKS181301A021A	RIKS181301A021A-4.24259-SR_R18.5045212.B180713_A6140.seq_align.txt	|GGGGAGATGCATATCTA -> ----------------- on 487-503 with type as -----------------
RIKS181301A021A	RIKS181301A021A-5.24259-SR_R18.5045212.B180713_A6141.seq_align.txt	|GGGGAGATGCATATCTA -> ----------------- on 487-503 with type as -----------------
RIKS181301A021A	RIKS181301A021A-6.24259-SR_R18.5045212.B180713_A6142.seq_align.txt	|GGAGATG -> ------- on 489-495 with type as -------
RIKS181301A021A	RIKS181301A021A-8.24259-SR_R18.5045212.B180713_A6144.seq_align.txt	|GGGGAGATGCATATCTA -> ----------------- on 487-503 with type as -----------------
RIKS181301A039A	RIKS181301A039A-1.24259-SR_R18.5045212.B180713_A6145.seq_align.txt	Double peaks	|GGGGGAGATGCATA -> -------------- on 486-499 with type as --------------;T -> G on 765-765 with type as v
RIKS181301A039A	RIKS181301A039A-3.24259-SR_R18.5045212.B180713_A6147.seq_align.txt	Double peaks	|GAGATGCA -> -------- on 490-497 with type as --------;G -> A on 642-642 with type as i;T -> G on 673-673 with type as v
RIKS181301A039A	RIKS181301A039A-4.24259-SR_R18.5045212.B180713_A6148.seq_align.txt	|GAGATGCA -> -------- on 490-497 with type as --------	|GAGATGCA -> -------- on 490-497 with type as --------;--- -> TTT on 520-520 with type as ---
RIKS181301A039A	RIKS181301A039A-5.24259-SR_R18.5045212.B180713_A6149.seq_align.txt	|GAGATGCA -> -------- on 490-497 with type as --------
RIKS181301A039A	RIKS181301A039A-7.24259-SR_R18.5045212.B180713_A6151.seq_align.txt	|GAGATGCA -> -------- on 490-497 with type as --------
RIKS181301A046A	RIKS181301A046A-1.24259-SR_R18.5045212.B180713_A6153.seq_align.txt	|GTAGGGGGAGATG -> ------------- on 483-495 with type as -------------
RIKS181301A046A	RIKS181301A046A-2.24259-SR_R18.5045212.B180713_A6154.seq_align.txt	|GGGGAGATG -> --------- on 487-495 with type as ---------
RIKS181301A046A	RIKS181301A046A-3.24259-SR_R18.5045212.B180713_A6155.seq_align.txt	|GGGGAGATG -> --------- on 487-495 with type as ---------
RIKS181301A046A	RIKS181301A046A-4.24259-SR_R18.5045212.B180713_A6156.seq_align.txt	|GGGGAGATG -> --------- on 487-495 with type as ---------	|GGGGAGATG -> --------- on 487-495 with type as ---------;- -> T on 510-510 with type as -
RIKS181301A046A	RIKS181301A046A-5.24259-SR_R18.5045212.B180713_A6157.seq_align.txt	|GGGGAGATG -> --------- on 487-495 with type as ---------
RIKS181301A046A	RIKS181301A046A-6.24259-SR_R18.5045212.B180713_A6158.seq_align.txt	|GGGGAGATG -> --------- on 487-495 with type as ---------
RIKS181301A046A	RIKS181301A046A-7.24259-SR_R18.5045212.B180713_A6159.seq_align.txt	|GTAGGGGGAGATG -> ------------- on 483-495 with type as -------------
RIKS181301A046A	RIKS181301A046A-8.24259-SR_R18.5045212.B180713_A6160.seq_align.txt	|GGGGAGATG -> --------- on 487-495 with type as ---------
RIKS181301A051A	RIKS181301A051A-1.24259-SR_R18.5045212.B180713_A6161.seq_align.txt	|AGGGGGAGATGCATATCTAACCT -> ----------------------- on 485-507 with type as -----------------------
RIKS181301A051A	RIKS181301A051A-2.24259-SR_R18.5045212.B180713_A6162.seq_align.txt	|AGGGGGAGATGCATATCTAACCT -> ----------------------- on 485-507 with type as -----------------------
RIKS181301A051A	RIKS181301A051A-3.24259-SR_R18.5045212.B180713_A6163.seq_align.txt	|GGGG -> ---- on 487-490 with type as ----
RIKS181301A051A	RIKS181301A051A-5.24259-SR_R18.5045212.B180713_A6165.seq_align.txt	|GGGG -> ---- on 487-490 with type as ----
RIKS181301A051A	RIKS181301A051A-6.24259-SR_R18.5045212.B180713_A6166.seq_align.txt	|AGGGGGAGATGCATATCTAACCT -> ----------------------- on 485-507 with type as -----------------------
RIKS181301A051A	RIKS181301A051A-7.24259-SR_R18.5045212.B180713_A6167.seq_align.txt	|AGGGGGAGATGCATATCTAACCT -> ----------------------- on 485-507 with type as -----------------------
RIKS181301A051A	RIKS181301A051A-8.24259-SR_R18.5045212.B180713_A6168.seq_align.txt	Double peaks	|G -> T on 486-486 with type as v;G -> T on 488-488 with type as v;GGAG -> ---- on 489-492 with type as ----;A -> T on 497-497 with type as v;A -> T on 499-499 with type as v;- -> T on 500-500 with type as -;AA -> TG on 503-504 with type as vi;C -> T on 506-506 with type as i;T -> G on 509-509 with type as v;T -> A on 511-511 with type as v;T -> A on 513-513 with type as v;T -> C on 517-517 with …
RIKS181301A057A	RIKS181301A057A-1.24259-SR_R18.5045212.B180713_A6169.seq_align.txt	|GGGAGATG -> -------- on 488-495 with type as --------
RIKS181301A057A	RIKS181301A057A-2.24259-SR_R18.5045212.B180713_A6170.seq_align.txt	|GGGAGATG -> -------- on 488-495 with type as --------
RIKS181301A057A	RIKS181301A057A-3.24259-SR_R18.5045212.B180713_A6171.seq_align.txt	|GGGAGATG -> -------- on 488-495 with type as --------
RIKS181301A057A	RIKS181301A057A-7.24259-SR_R18.5045212.B180713_A6175.seq_align.txt	|GGGAGATG -> -------- on 488-495 with type as --------
RIKS181301A064A	RIKS181301A064A-1.24259-SR_R18.5045212.B180713_A6177.seq_align.txt	|GTAGGGGGAGATGCA -> --------------- on 483-497 with type as ---------------
RIKS181301A064A	RIKS181301A064A-2.24259-SR_R18.5045212.B180713_A6178.seq_align.txt	|GTAGGGGGAGATGCA -> --------------- on 483-497 with type as ---------------
RIKS181301A064A	RIKS181301A064A-4.24259-SR_R18.5045212.B180713_A6180.seq_align.txt	|AGGGGGAGATG -> ----------- on 485-495 with type as -----------;A -> - on 497-497 with type as -
RIKS181301A064A	RIKS181301A064A-5.24259-SR_R18.5045212.B180713_A6181.seq_align.txt	|GTAGGGGGAGATGCA -> --------------- on 483-497 with type as ---------------
RIKS181301A064A	RIKS181301A064A-6.24259-SR_R18.5045212.B180713_A6182.seq_align.txt	|GC -> -- on 495-496 with type as --
RIKS181301A064A	RIKS181301A064A-7.24259-SR_R18.5045212.B180713_A6183.seq_align.txt	Double peaks	|GTAGGGGGAGATGCA -> --------------- on 483-497 with type as ---------------
RIKS181301A064A	RIKS181301A064A-8.24259-SR_R18.5045212.B180713_A6184.seq_align.txt	|GC -> -- on 495-496 with type as --
RIKS181301A065A	RIKS181301A065A-1.24259-SR_R18.5045212.B180713_A6185.seq_align.txt	|GGGAGATG -> -------- on 488-495 with type as --------
RIKS181301A065A	RIKS181301A065A-2.24259-SR_R18.5045212.B180713_A6186.seq_align.txt	|GGGGGAGATG -> ---------- on 486-495 with type as ----------	|GGGGGAGATG -> ---------- on 486-495 with type as ----------;- -> T on 510-510 with type as -
RIKS181301A065A	RIKS181301A065A-3.24259-SR_R18.5045212.B180713_A6187.seq_align.txt	|GGGGGAGATG -> ---------- on 486-495 with type as ----------
RIKS181301A065A	RIKS181301A065A-6.24259-SR_R18.5045212.B180713_A6190.seq_align.txt	|GGGGGAGATG -> ---------- on 486-495 with type as ----------	|GGGGGAGATG -> ---------- on 486-495 with type as ----------;- -> T on 510-510 with type as -
RIKS181301A065A	RIKS181301A065A-7.24259-SR_R18.5045212.B180713_A6191.seq_align.txt	|GGGAGATG -> -------- on 488-495 with type as --------
RIKS181301A065A	RIKS181301A065A-8.24259-SR_R18.5045212.B180713_A6192.seq_align.txt	|GGGAGATG -> -------- on 488-495 with type as --------
RIKS181301A070A	RIKS181301A070A-1.24259-SR_R18.5045212.B180713_A6193.seq_align.txt	|GGGGAGATG -> --------- on 487-495 with type as ---------
RIKS181301A070A	RIKS181301A070A-2.24259-SR_R18.5045212.B180713_A6194.seq_align.txt	|GGGAGATGCA -> ---------- on 488-497 with type as ----------
RIKS181301A070A	RIKS181301A070A-3.24259-SR_R18.5045212.B180713_A6195.seq_align.txt	|GGGGAGATG -> --------- on 487-495 with type as ---------
RIKS181301A070A	RIKS181301A070A-4.24259-SR_R18.5045212.B180713_A6196.seq_align.txt	|GGGAGATGCA -> ---------- on 488-497 with type as ----------
RIKS181301A070A	RIKS181301A070A-5.24259-SR_R18.5045223.B180713_A6197.seq_align.txt	|GGGAGATGCA -> ---------- on 488-497 with type as ----------
RIKS181301A070A	RIKS181301A070A-6.24259-SR_R18.5045223.B180713_A6198.seq_align.txt	|GGGAGATGCA -> ---------- on 488-497 with type as ----------
RIKS181301A070A	RIKS181301A070A-7.24259-SR_R18.5045223.B180713_A6199.seq_align.txt	|GGGAGATGCA -> ---------- on 488-497 with type as ----------
RIKS181301A070A	RIKS181301A070A-8.24259-SR_R18.5045223.B180713_A6200.seq_align.txt	|GGGGAGATG -> --------- on 487-495 with type as ---------
RIKS181302A071A	RIKS181302A071A-1.24259-SR_R18.5045223.B180713_A6201.seq_align.txt	|CAGTAGGGGGAGATGCA -> ----------------- on 481-497 with type as -----------------
RIKS181302A071A	RIKS181302A071A-2.24259-SR_R18.5045223.B180713_A6202.seq_align.txt	|Unaligned fragments on contig 1 bp. which was on 438 to 502 on the reference.
RIKS181302A071A	RIKS181302A071A-3.24259-SR_R18.5045223.B180713_A6203.seq_align.txt	|CAGTAGGGGGAGATGCA -> ----------------- on 481-497 with type as -----------------
RIKS181302A071A	RIKS181302A071A-4.24259-SR_R18.5045223.B180713_A6204.seq_align.txt	|Unaligned fragments on contig 1 bp. which was on 438 to 502 on the reference.
RIKS181302A071A	RIKS181302A071A-5.24259-SR_R18.5045223.B180713_A6205.seq_align.txt	|Unaligned fragments on contig 1 bp. which was on 438 to 502 on the reference.	|- -> T on 520-520 with type as -;Unaligned fragments on contig 1 bp. which was on 438 to 502 on the reference.
RIKS181302A071A	RIKS181302A071A-6.24259-SR_R18.5045223.B180713_A6206.seq_align.txt	|CAGTAGGGGGAGATGCA -> ----------------- on 481-497 with type as -----------------
RIKS181302A071A	RIKS181302A071A-7.24259-SR_R18.5045223.B180713_A6207.seq_align.txt	|Unaligned fragments on contig 1 bp. which was on 438 to 502 on the reference.
RIKS181302A071A	RIKS181302A071A-8.24259-SR_R18.5045223.B180713_A6208.seq_align.txt	|CAGTAGGGGGAGATGCA -> ----------------- on 481-497 with type as -----------------
RIKS181302A077A	RIKS181302A077A-1.24259-SR_R18.5045223.B180713_A6209.seq_align.txt	|Unaligned fragments on contig 1 bp. which was on 439 to 501 on the reference.	|Unaligned fragments on contig 1 bp. which was on 438 to 502 on the reference.
RIKS181302A077A	RIKS181302A077A-2.24259-SR_R18.5045223.B180713_A6210.seq_align.txt	|AGGGGGA -> ------- on 485-491 with type as -------;A -> T on 493-493 with type as v;G -> - on 495-495 with type as -;C -> T on 496-496 with type as i	|AGGGGGA -> ------- on 485-491 with type as -------;A -> T on 493-493 with type as v;G -> - on 495-495 with type as -;C -> T on 496-496 with type as i;A -> - on 843-843 with type as -
RIKS181302A077A	RIKS181302A077A-3.24259-SR_R18.5045223.B180713_A6211.seq_align.txt	|GGGGGAGATG -> ---------- on 486-495 with type as ----------
RIKS181302A077A	RIKS181302A077A-4.24259-SR_R18.5045223.B180713_A6212.seq_align.txt	|GGGGGAGATG -> ---------- on 486-495 with type as ----------
RIKS181302A077A	RIKS181302A077A-5.24259-SR_R18.5045223.B180713_A6213.seq_align.txt	|GGGGGAGATG -> ---------- on 486-495 with type as ----------
RIKS181302A077A	RIKS181302A077A-6.24259-SR_R18.5045223.B180713_A6214.seq_align.txt	|GGGGAGATGCATATCTA -> ----------------- on 487-503 with type as -----------------
RIKS181302A077A	RIKS181302A077A-8.24259-SR_R18.5045223.B180713_A6216.seq_align.txt	|GGGGGAGATG -> ---------- on 486-495 with type as ----------
RIKS181302A118A	RIKS181302A118A-1.24259-SR_R18.5045223.B180713_A6217.seq_align.txt	|GGGGAG -> ------ on 487-492 with type as ------
RIKS181302A118A	RIKS181302A118A-2.24259-SR_R18.5045223.B180713_A6218.seq_align.txt	|GGGGAG -> ------ on 487-492 with type as ------
RIKS181302A118A	RIKS181302A118A-3.24259-SR_R18.5045223.B180713_A6219.seq_align.txt	|GGGGAG -> ------ on 487-492 with type as ------
RIKS181302A118A	RIKS181302A118A-4.24259-SR_R18.5045223.B180713_A6220.seq_align.txt	|GGGGAG -> ------ on 487-492 with type as ------
RIKS181302A118A	RIKS181302A118A-5.24259-SR_R18.5045223.B180713_A6221.seq_align.txt	|GGGGAGATGC -> ---------- on 487-496 with type as ----------
RIKS181302A118A	RIKS181302A118A-6.24259-SR_R18.5045223.B180713_A6222.seq_align.txt	|GGGGAGATGC -> ---------- on 487-496 with type as ----------
RIKS181302A118A	RIKS181302A118A-8.24259-SR_R18.5045223.B180713_A6224.seq_align.txt	|GGGGAG -> ------ on 487-492 with type as ------	|GGGGAG -> ------ on 487-492 with type as ------;- -> T on 520-520 with type as -
RIKS181302A131A	RIKS181302A131A-1.24259-SR_R18.5045223.B180713_A6225.seq_align.txt	|GGGGAGATGC -> ---------- on 487-496 with type as ----------
RIKS181302A131A	RIKS181302A131A-2.24259-SR_R18.5045223.B180713_A6226.seq_align.txt	|GAGATG -> ------ on 490-495 with type as ------
RIKS181302A131A	RIKS181302A131A-3.24259-SR_R18.5045223.B180713_A6227.seq_align.txt	|GAGATG -> ------ on 490-495 with type as ------
RIKS181302A131A	RIKS181302A131A-5.24259-SR_R18.5045223.B180713_A6229.seq_align.txt	|GAGATG -> ------ on 490-495 with type as ------
RIKS181302A131A	RIKS181302A131A-6.24259-SR_R18.5045223.B180713_A6230.seq_align.txt	|GAGATG -> ------ on 490-495 with type as ------
RIKS181302A131A	RIKS181302A131A-7.24259-SR_R18.5045223.B180713_A6231.seq_align.txt	|GGGGAGATGC -> ---------- on 487-496 with type as ----------
RIKS181302A131A	RIKS181302A131A-8.24259-SR_R18.5045223.B180713_A6232.seq_align.txt	|GAGATG -> ------ on 490-495 with type as ------
RIKS181303A001A	RIKS181303A001A-1.24259-SR_R18.5045223.B180713_A6233.seq_align.txt	|AGGGGGAGATGCA -> ------------- on 485-497 with type as -------------
RIKS181303A001A	RIKS181303A001A-2.24259-SR_R18.5045223.B180713_A6234.seq_align.txt	|AGGGGGAGATGCA -> ------------- on 485-497 with type as -------------
RIKS181303A001A	RIKS181303A001A-5.24259-SR_R18.5045223.B180713_A6237.seq_align.txt	Wild-Type	|- -> T on 520-520 with type as -
RIKS181303A001A	RIKS181303A001A-6.24259-SR_R18.5045223.B180713_A6238.seq_align.txt	|AGGGGGAGATGCA -> ------------- on 485-497 with type as -------------	|AGGGGGAGATGCA -> ------------- on 485-497 with type as -------------;- -> T on 510-510 with type as -
RIKS181303A014A	RIKS181303A014A-1.24259-SR_R18.5045223.B180713_A6241.seq_align.txt	|GGGAGATG -> -------- on 488-495 with type as --------	|GGGAGATG -> -------- on 488-495 with type as --------;- -> T on 510-510 with type as -
RIKS181303A014A	RIKS181303A014A-3.24259-SR_R18.5045223.B180713_A6243.seq_align.txt	|GGGGAGATGC -> ---------- on 487-496 with type as ----------
RIKS181303A014A	RIKS181303A014A-4.24259-SR_R18.5045223.B180713_A6244.seq_align.txt	Double peaks	|GGGAGATG -> -------- on 488-495 with type as --------
RIKS181303A014A	RIKS181303A014A-6.24259-SR_R18.5045223.B180713_A6246.seq_align.txt	|GGGAGATG -> -------- on 488-495 with type as --------
RIKS181303A014A	RIKS181303A014A-7.24259-SR_R18.5045223.B180713_A6247.seq_align.txt	|GGGAGATG -> -------- on 488-495 with type as --------
RIKS181303A014A	RIKS181303A014A-8.24259-SR_R18.5045223.B180713_A6248.seq_align.txt	|GGGAGATG -> -------- on 488-495 with type as --------
RIKS180900A042A	RIKS180900A042A-3.24259-SR_R18.5045194.B180713_A6027.seq_align.txt	Wild-Type
RIKS180901A008A	RIKS180901A008A-1.24259-SR_R18.5045194.B180713_A6041.seq_align.txt	Wild-Type
RIKS180901A008A	RIKS180901A008A-2.24259-SR_R18.5045194.B180713_A6042.seq_align.txt	Wild-Type
RIKS180901A008A	RIKS180901A008A-5.24259-SR_R18.5045194.B180713_A6045.seq_align.txt	Wild-Type
RIKS180901A039A	RIKS180901A039A-3.24259-SR_R18.5045194.B180713_A6083.seq_align.txt	Wild-Type
RIKS180901A039A	RIKS180901A039A-6.24259-SR_R18.5045194.B180713_A6086.seq_align.txt	Wild-Type
RIKS181301A010A	RIKS181301A010A-4.24259-SR_R18.5045212.B180713_A6132.seq_align.txt	Wild-Type
RIKS181301A021A	RIKS181301A021A-3.24259-SR_R18.5045212.B180713_A6139.seq_align.txt	Wild-Type
RIKS181301A021A	RIKS181301A021A-7.24259-SR_R18.5045212.B180713_A6143.seq_align.txt	Wild-Type
RIKS181301A039A	RIKS181301A039A-2.24259-SR_R18.5045212.B180713_A6146.seq_align.txt	Wild-Type
RIKS181301A039A	RIKS181301A039A-6.24259-SR_R18.5045212.B180713_A6150.seq_align.txt	Wild-Type
RIKS181301A039A	RIKS181301A039A-8.24259-SR_R18.5045212.B180713_A6152.seq_align.txt	Wild-Type
RIKS181301A057A	RIKS181301A057A-8.24259-SR_R18.5045212.B180713_A6176.seq_align.txt	Wild-Type
RIKS181303A001A	RIKS181303A001A-3.24259-SR_R18.5045223.B180713_A6235.seq_align.txt	Wild-Type
RIKS181303A001A	RIKS181303A001A-4.24259-SR_R18.5045223.B180713_A6236.seq_align.txt	Wild-Type
RIKS181303A001A	RIKS181303A001A-7.24259-SR_R18.5045223.B180713_A6239.seq_align.txt	Wild-Type

## Sheet: Org Data_Source
	RIKS180900A009A-1.24259-SR_R18.5045194.B180713_A6001.seq_align.txt	|TAGGGGGAGAT -> ----------- on 484-494 with type as -----------
	RIKS180900A009A-4.24259-SR_R18.5045194.B180713_A6004.seq_align.txt	|GGGGAGATG -> --------- on 487-495 with type as ---------
	RIKS180900A009A-5.24259-SR_R18.5045194.B180713_A6005.seq_align.txt	|GGGGAGATG -> --------- on 487-495 with type as ---------
	RIKS180900A009A-6.24259-SR_R18.5045194.B180713_A6006.seq_align.txt	|TAGGGGGAGAT -> ----------- on 484-494 with type as -----------
	RIKS180900A009A-7.24259-SR_R18.5045194.B180713_A6007.seq_align.txt	|GGGGAGATG -> --------- on 487-495 with type as ---------
	RIKS180900A009A-8.24259-SR_R18.5045194.B180713_A6008.seq_align.txt	|TAGGGGGAGAT -> ----------- on 484-494 with type as -----------
	RIKS180900A014A-1.24259-SR_R18.5045194.B180713_A6009.seq_align.txt	|GGGAGATGC -> --------- on 488-496 with type as ---------
	RIKS180900A014A-2.24259-SR_R18.5045194.B180713_A6010.seq_align.txt	|GGGAGATGC -> --------- on 488-496 with type as ---------
	RIKS180900A014A-3.24259-SR_R18.5045194.B180713_A6011.seq_align.txt	|GGGAGATGC -> --------- on 488-496 with type as ---------
	RIKS180900A014A-5.24259-SR_R18.5045194.B180713_A6013.seq_align.txt	|GGGAGATGC -> --------- on 488-496 with type as ---------
	RIKS180900A014A-6.24259-SR_R18.5045194.B180713_A6014.seq_align.txt	|GGGAGATGC -> --------- on 488-496 with type as ---------;T -> - on 511-511 with type as -
	RIKS180900A014A-7.24259-SR_R18.5045194.B180713_A6015.seq_align.txt	|GGGAGATGC -> --------- on 488-496 with type as ---------
	RIKS180900A030A-1.24259-SR_R18.5045194.B180713_A6017.seq_align.txt	|GGGGAGAT -> -------- on 487-494 with type as --------;G -> C on 495-495 with type as v;- -> T on 510-510 with type as -
	RIKS180900A030A-2.24259-SR_R18.5045194.B180713_A6018.seq_align.txt	|GGGAGATGCA -> ---------- on 488-497 with type as ----------;- -> T on 510-510 with type as -
	RIKS180900A030A-4.24259-SR_R18.5045194.B180713_A6020.seq_align.txt	|GGGGAGAT -> -------- on 487-494 with type as --------;G -> C on 495-495 with type as v
	RIKS180900A030A-5.24259-SR_R18.5045194.B180713_A6021.seq_align.txt	|GGGGAGAT -> -------- on 487-494 with type as --------;G -> C on 495-495 with type as v;- -> T on 510-510 with type as -
	RIKS180900A030A-6.24259-SR_R18.5045194.B180713_A6022.seq_align.txt	|GGGAGATGCA -> ---------- on 488-497 with type as ----------;- -> T on 510-510 with type as -
	RIKS180900A030A-7.24259-SR_R18.5045194.B180713_A6023.seq_align.txt	|GGGAGATGCA -> ---------- on 488-497 with type as ----------
	RIKS180900A030A-8.24259-SR_R18.5045194.B180713_A6024.seq_align.txt	|A -> - on 388-388 with type as -;GGGGAGAT -> -------- on 487-494 with type as --------;G -> C on 495-495 with type as v;- -> T on 510-510 with type as -
	RIKS180900A042A-1.24259-SR_R18.5045194.B180713_A6025.seq_align.txt	|G -> A on 733-733 with type as i;T -> G on 779-779 with type as v;T -> G on 821-821 with type as v
	RIKS180900A042A-4.24259-SR_R18.5045194.B180713_A6028.seq_align.txt	|GATGCA -> ------ on 492-497 with type as ------
	RIKS180900A042A-6.24259-SR_R18.5045194.B180713_A6030.seq_align.txt	|G -> T on 492-492 with type as v
	RIKS180900A042A-7.24259-SR_R18.5045194.B180713_A6031.seq_align.txt	|GGGGGAGATGCATATCTA -> ------------------ on 486-503 with type as ------------------
	RIKS180900A042A-8.24259-SR_R18.5045194.B180713_A6032.seq_align.txt	|GATGCA -> ------ on 492-497 with type as ------
	RIKS180900A053A-1.24259-SR_R18.5045194.B180713_A6033.seq_align.txt	|GGGGAGATG -> --------- on 487-495 with type as ---------;- -> T on 510-510 with type as -
	RIKS180900A053A-2.24259-SR_R18.5045194.B180713_A6034.seq_align.txt	|GGGGAGATG -> --------- on 487-495 with type as ---------
	RIKS180900A053A-3.24259-SR_R18.5045194.B180713_A6035.seq_align.txt	|GGGGAGATG -> --------- on 487-495 with type as ---------
	RIKS180900A053A-4.24259-SR_R18.5045194.B180713_A6036.seq_align.txt	|GGGGAGATG -> --------- on 487-495 with type as ---------
	RIKS180900A053A-5.24259-SR_R18.5045194.B180713_A6037.seq_align.txt	|GGGGAGATG -> --------- on 487-495 with type as ---------
	RIKS180900A053A-6.24259-SR_R18.5045194.B180713_A6038.seq_align.txt	|GGGAGATG -> -------- on 488-495 with type as --------;- -> T on 510-510 with type as -
	RIKS180900A053A-8.24259-SR_R18.5045194.B180713_A6040.seq_align.txt	|GGGGAGATG -> --------- on 487-495 with type as ---------;- -> T on 510-510 with type as -
	RIKS180901A008A-3.24259-SR_R18.5045194.B180713_A6043.seq_align.txt	|AGATG -> ----- on 491-495 with type as -----
	RIKS180901A008A-4.24259-SR_R18.5045194.B180713_A6044.seq_align.txt	|AGATG -> ----- on 491-495 with type as -----;-- -> TT on 520-520 with type as --
	RIKS180901A008A-6.24259-SR_R18.5045194.B180713_A6046.seq_align.txt	|GGGGGAGATGCA -> ------------ on 486-497 with type as ------------
	RIKS180901A008A-7.24259-SR_R18.5045194.B180713_A6047.seq_align.txt	|-- -> TT on 520-520 with type as --
	RIKS180901A008A-8.24259-SR_R18.5045194.B180713_A6048.seq_align.txt	|A -> - on 388-388 with type as -;AGATG -> ----- on 491-495 with type as -----
	RIKS180901A022A-1.24259-SR_R18.5045194.B180713_A6049.seq_align.txt	|GGAGATGCATATCTAAC -> ----------------- on 489-505 with type as -----------------
	RIKS180901A022A-2.24259-SR_R18.5045194.B180713_A6050.seq_align.txt	|GGAGATGCATATCTAAC -> ----------------- on 489-505 with type as -----------------
	RIKS180901A022A-3.24259-SR_R18.5045194.B180713_A6051.seq_align.txt	|GGGGGAGATGCATA -> -------------- on 486-499 with type as --------------
	RIKS180901A022A-4.24259-SR_R18.5045194.B180713_A6052.seq_align.txt	|GGGGGAGATGCATA -> -------------- on 486-499 with type as --------------
	RIKS180901A022A-5.24259-SR_R18.5045194.B180713_A6053.seq_align.txt	|GGAGATG -> ------- on 489-495 with type as -------;A -> - on 497-497 with type as -;A -> - on 499-499 with type as -;C -> - on 501-501 with type as -;A -> G on 503-503 with type as i;ACC -> --- on 504-506 with type as ---;GT -> -- on 510-511 with type as --
	RIKS180901A022A-6.24259-SR_R18.5045194.B180713_A6054.seq_align.txt	|GGAGATGCATATCTAAC -> ----------------- on 489-505 with type as -----------------
	RIKS180901A022A-8.24259-SR_R18.5045194.B180713_A6056.seq_align.txt	|GGAGATGCATATCTAAC -> ----------------- on 489-505 with type as -----------------
	RIKS180901A025A-1.24259-SR_R18.5045194.B180713_A6057.seq_align.txt	|GGAGATG -> ------- on 489-495 with type as -------;- -> T on 520-520 with type as -
	RIKS180901A025A-2.24259-SR_R18.5045194.B180713_A6058.seq_align.txt	|GGGG -> ---- on 487-490 with type as ----;G -> T on 492-492 with type as v;GC -> CT on 495-496 with type as vi;TATC -> ACCT on 498-501 with type as vvii;AACC -> TGTT on 503-506 with type as viii;G -> T on 510-510 with type as v
	RIKS180901A025A-3.24259-SR_R18.5045194.B180713_A6059.seq_align.txt	|GGGGAGATGC -> ---------- on 487-496 with type as ----------
	RIKS180901A025A-4.24259-SR_R18.5045194.B180713_A6060.seq_align.txt	|A -> - on 388-388 with type as -;GGAGATG -> ------- on 489-495 with type as -------
	RIKS180901A025A-5.24259-SR_R18.5045194.B180713_A6061.seq_align.txt	|GGGGAGATGC -> ---------- on 487-496 with type as ----------
	RIKS180901A025A-7.24259-SR_R18.5045194.B180713_A6063.seq_align.txt	|GGAGATG -> ------- on 489-495 with type as -------;- -> T on 520-520 with type as -
	RIKS180901A025A-8.24259-SR_R18.5045194.B180713_A6064.seq_align.txt	|GGAGATG -> ------- on 489-495 with type as -------;- -> T on 520-520 with type as -
	RIKS180901A033A-1.24259-SR_R18.5045194.B180713_A6065.seq_align.txt	|GTAGGGGGAGATGCA -> --------------- on 483-497 with type as ---------------
	RIKS180901A033A-3.24259-SR_R18.5045194.B180713_A6067.seq_align.txt	|GTAGGGGGAGATGCA -> --------------- on 483-497 with type as ---------------
	RIKS180901A033A-5.24259-SR_R18.5045194.B180713_A6069.seq_align.txt	|GTAGGGGGAGATGCA -> --------------- on 483-497 with type as ---------------
	RIKS180901A033A-6.24259-SR_R18.5045194.B180713_A6070.seq_align.txt	|T -> C on 250-250 with type as i;T -> C on 256-256 with type as i;T -> A on 259-259 with type as v;GG -> TC on 263-264 with type as vv;T -> G on 273-273 with type as v;A -> G on 275-275 with type as i;AAG -> GGT on 280-282 with type as iiv;T -> A on 287-287 with type as v;CA -> TC on 291-292 with type as iv;T -> C on 294-294 with type as i;G -> T on 297-297 with type as v;GGA -> TTG on 305-307 w…
	RIKS180901A033A-7.24259-SR_R18.5045194.B180713_A6071.seq_align.txt	|GGGGAGA -> ------- on 487-493 with type as -------;G -> - on 495-495 with type as -
	RIKS180901A033A-8.24259-SR_R18.5045194.B180713_A6072.seq_align.txt	|GTAGGGGGAGATGCA -> --------------- on 483-497 with type as ---------------
	RIKS180901A034A-1.24259-SR_R18.5045194.B180713_A6073.seq_align.txt	|AGGGGGAGATGCATATCTAA -> -------------------- on 485-504 with type as --------------------
	RIKS180901A034A-2.24259-SR_R18.5045194.B180713_A6074.seq_align.txt	|AGGGGGAGATGCATATCTAA -> -------------------- on 485-504 with type as --------------------
	RIKS180901A034A-3.24259-SR_R18.5045194.B180713_A6075.seq_align.txt	|GGGAGATG -> -------- on 488-495 with type as --------
	RIKS180901A034A-4.24259-SR_R18.5045194.B180713_A6076.seq_align.txt	|AGGGGGAGATGCATATCTAA -> -------------------- on 485-504 with type as --------------------;- -> T on 510-510 with type as -
	RIKS180901A034A-5.24259-SR_R18.5045194.B180713_A6077.seq_align.txt	|GGGAGATG -> -------- on 488-495 with type as --------
	RIKS180901A034A-6.24259-SR_R18.5045194.B180713_A6078.seq_align.txt	|GGGAGATG -> -------- on 488-495 with type as --------
	RIKS180901A034A-7.24259-SR_R18.5045194.B180713_A6079.seq_align.txt	|AGGGGGAGATGCATATCTAA -> -------------------- on 485-504 with type as --------------------
	RIKS180901A034A-8.24259-SR_R18.5045194.B180713_A6080.seq_align.txt	|AGGGGGAGATGCATATCTAA -> -------------------- on 485-504 with type as --------------------;- -> T on 510-510 with type as -
	RIKS180901A039A-1.24259-SR_R18.5045194.B180713_A6081.seq_align.txt	|GGGGAGATGCATAT -> -------------- on 487-500 with type as --------------
	RIKS180901A039A-2.24259-SR_R18.5045194.B180713_A6082.seq_align.txt	|GGGAGATG -> -------- on 488-495 with type as --------
	RIKS180901A039A-4.24259-SR_R18.5045194.B180713_A6084.seq_align.txt	|GGGGAGATGCATAT -> -------------- on 487-500 with type as --------------
	RIKS180901A039A-5.24259-SR_R18.5045194.B180713_A6085.seq_align.txt	|A -> - on 388-388 with type as -;GGGGAGATGCATAT -> -------------- on 487-500 with type as --------------
	RIKS180901A039A-7.24259-SR_R18.5045194.B180713_A6087.seq_align.txt	|GTAGGGGGAGATGCA -> --------------- on 483-497 with type as ---------------
	RIKS180901A039A-8.24259-SR_R18.5045194.B180713_A6088.seq_align.txt	|GGAGATG -> ------- on 489-495 with type as -------;A -> - on 497-497 with type as -;A -> - on 499-499 with type as -;CTAACC -> ------ on 501-506 with type as ------;T -> G on 508-508 with type as v;G -> - on 510-510 with type as -
	RIKS180901A046A-1.24259-SR_R18.5045194.B180713_A6089.seq_align.txt	|GTACAGTAGGGGGAGATGC -> ------------------- on 478-496 with type as -------------------
	RIKS180901A046A-2.24259-SR_R18.5045194.B180713_A6090.seq_align.txt	|GTACAGTAGGGGGAGATGC -> ------------------- on 478-496 with type as -------------------
	RIKS180901A046A-3.24259-SR_R18.5045194.B180713_A6091.seq_align.txt	|GGGGGAGA -> -------- on 486-493 with type as --------;G -> - on 495-495 with type as -
	RIKS180901A046A-4.24259-SR_R18.5045194.B180713_A6092.seq_align.txt	|GTACAGTAGGGGGAGATGC -> ------------------- on 478-496 with type as -------------------
	RIKS180901A046A-5.24259-SR_R18.5045194.B180713_A6093.seq_align.txt	|GTACAGTAGGGGGAGATGC -> ------------------- on 478-496 with type as -------------------
	RIKS180901A046A-6.24259-SR_R18.5045194.B180713_A6094.seq_align.txt	|GTACAGTAGGGGGAGATGC -> ------------------- on 478-496 with type as -------------------
	RIKS180901A046A-7.24259-SR_R18.5045194.B180713_A6095.seq_align.txt	|GTACAGTAGGGGGAGATGC -> ------------------- on 478-496 with type as -------------------
	RIKS180901A046A-8.24259-SR_R18.5045194.B180713_A6096.seq_align.txt	|GGGGGAGA -> -------- on 486-493 with type as --------;G -> - on 495-495 with type as -
	RIKS180901A049A-1.24259-SR_R18.5045194.B180713_A6097.seq_align.txt	|GGGGAGATG -> --------- on 487-495 with type as ---------
	RIKS180901A049A-3.24259-SR_R18.5045212.B180713_A6099.seq_align.txt	|GGGGAGATG -> --------- on 487-495 with type as ---------;C -> - on 855-855 with type as -
	RIKS180901A049A-4.24259-SR_R18.5045212.B180713_A6100.seq_align.txt	|GGGGAGATG -> --------- on 487-495 with type as ---------
	RIKS180901A049A-5.24259-SR_R18.5045212.B180713_A6101.seq_align.txt	|GGGGAGATG -> --------- on 487-495 with type as ---------;- -> T on 510-510 with type as -
	RIKS180901A049A-6.24259-SR_R18.5045212.B180713_A6102.seq_align.txt	|GGAGATG -> ------- on 489-495 with type as -------
	RIKS180901A049A-7.24259-SR_R18.5045212.B180713_A6103.seq_align.txt	|GGAGATG -> ------- on 489-495 with type as -------
	RIKS180901A049A-8.24259-SR_R18.5045212.B180713_A6104.seq_align.txt	|GGAGATG -> ------- on 489-495 with type as -------
	RIKS180901A061A-1.24259-SR_R18.5045212.B180713_A6105.seq_align.txt	|GGGAGATGCAT -> ----------- on 488-498 with type as -----------
	RIKS180901A061A-2.24259-SR_R18.5045212.B180713_A6106.seq_align.txt	|TAGGGGGAGATGC -> ------------- on 484-496 with type as -------------
	RIKS180901A061A-3.24259-SR_R18.5045212.B180713_A6107.seq_align.txt	|TAGGGGGAGATGC -> ------------- on 484-496 with type as -------------
	RIKS180901A061A-4.24259-SR_R18.5045212.B180713_A6108.seq_align.txt	|TAGGGGGAGATGC -> ------------- on 484-496 with type as -------------
	RIKS180901A061A-5.24259-SR_R18.5045212.B180713_A6109.seq_align.txt	|TAGGGGGAGATGC -> ------------- on 484-496 with type as -------------;-- -> CA on 96-96 with type as --;Unaligned fragments on contig 390 bp. which was on 106 to 391 on the reference.;Reversed Contig 409 bp. which was on 391 to 813 on the reference.
	RIKS180901A061A-6.24259-SR_R18.5045212.B180713_A6110.seq_align.txt	|GGGAGATGC -> --------- on 488-496 with type as ---------
	RIKS180901A061A-7.24259-SR_R18.5045212.B180713_A6111.seq_align.txt	|TAGGGGGAGATGC -> ------------- on 484-496 with type as -------------
	RIKS180901A061A-8.24259-SR_R18.5045212.B180713_A6112.seq_align.txt	|TAGGGGGAGATGC -> ------------- on 484-496 with type as -------------
	RIKS181300A021A-1.24259-SR_R18.5045212.B180713_A6113.seq_align.txt	|GGGG -> ---- on 487-490 with type as ----;GATG -> ---- on 492-495 with type as ----
	RIKS181300A021A-2.24259-SR_R18.5045212.B180713_A6114.seq_align.txt	|AGGGGGAGAT -> ---------- on 485-494 with type as ----------
	RIKS181300A021A-3.24259-SR_R18.5045212.B180713_A6115.seq_align.txt	|AGGGGGAGAT -> ---------- on 485-494 with type as ----------
	RIKS181300A021A-4.24259-SR_R18.5045212.B180713_A6116.seq_align.txt	|GGGG -> ---- on 487-490 with type as ----;GATG -> ---- on 492-495 with type as ----;- -> T on 520-520 with type as -
	RIKS181300A021A-5.24259-SR_R18.5045212.B180713_A6117.seq_align.txt	|AGGGGGAGAT -> ---------- on 485-494 with type as ----------;T -> - on 511-511 with type as -
	RIKS181300A021A-6.24259-SR_R18.5045212.B180713_A6118.seq_align.txt	|GGGG -> ---- on 487-490 with type as ----;GATG -> ---- on 492-495 with type as ----
	RIKS181300A021A-7.24259-SR_R18.5045212.B180713_A6119.seq_align.txt	|AGGGGGAGAT -> ---------- on 485-494 with type as ----------
	RIKS181300A021A-8.24259-SR_R18.5045212.B180713_A6120.seq_align.txt	|AGGGGGAGAT -> ---------- on 485-494 with type as ----------
	RIKS181301A004A-1.24259-SR_R18.5045212.B180713_A6121.seq_align.txt	|GCATA -> ----- on 495-499 with type as -----;C -> - on 501-501 with type as -
	RIKS181301A004A-2.24259-SR_R18.5045212.B180713_A6122.seq_align.txt	|T -> A on 468-468 with type as v;TTGGTGGTGT -> ---------- on 470-479 with type as ----------;C -> A on 481-481 with type as v;GT -> AA on 483-484 with type as iv;GGGGG -> ----- on 486-490 with type as -----;T -> A on 494-494 with type as v;GC -> -- on 495-496 with type as --;A -> T on 544-544 with type as v;G -> T on 587-587 with type as v;A -> C on 604-604 with type as v;T -> A on 615-615 with …
	RIKS181301A004A-3.24259-SR_R18.5045212.B180713_A6123.seq_align.txt	|CTTTTGGTGGT -> ----------- on 467-477 with type as -----------;T -> A on 479-479 with type as v;C -> A on 481-481 with type as v;GT -> AA on 483-484 with type as iv;G -> A on 486-486 with type as i;GGGG -> ---- on 487-490 with type as ----;T -> A on 494-494 with type as v;GC -> -- on 495-496 with type as --
	RIKS181301A004A-4.24259-SR_R18.5045212.B180713_A6124.seq_align.txt	|CTTTTGGTGGT -> ----------- on 467-477 with type as -----------;T -> A on 479-479 with type as v;C -> A on 481-481 with type as v;GT -> AA on 483-484 with type as iv;G -> A on 486-486 with type as i;GGGG -> ---- on 487-490 with type as ----;T -> A on 494-494 with type as v;GC -> -- on 495-496 with type as --
	RIKS181301A004A-5.24259-SR_R18.5045212.B180713_A6125.seq_align.txt	|CTTTTGGTGGT -> ----------- on 467-477 with type as -----------;T -> A on 479-479 with type as v;C -> A on 481-481 with type as v;GT -> AA on 483-484 with type as iv;G -> A on 486-486 with type as i;GGGG -> ---- on 487-490 with type as ----;T -> A on 494-494 with type as v;GC -> -- on 495-496 with type as --
	RIKS181301A004A-6.24259-SR_R18.5045212.B180713_A6126.seq_align.txt	|CTTTTGGTG -> --------- on 467-475 with type as ---------;TGT -> AAA on 477-479 with type as viv;C -> A on 481-481 with type as v;GT -> AA on 483-484 with type as iv;GGGGG -> ----- on 486-490 with type as -----;T -> A on 494-494 with type as v;GC -> -- on 495-496 with type as --
	RIKS181301A004A-7.24259-SR_R18.5045212.B180713_A6127.seq_align.txt	|GCATA -> ----- on 495-499 with type as -----;C -> - on 501-501 with type as -
	RIKS181301A004A-8.24259-SR_R18.5045212.B180713_A6128.seq_align.txt	|CTTTTGGTGGT -> ----------- on 467-477 with type as -----------;T -> A on 479-479 with type as v;C -> A on 481-481 with type as v;GT -> AA on 483-484 with type as iv;G -> A on 486-486 with type as i;GGGG -> ---- on 487-490 with type as ----;T -> A on 494-494 with type as v;GC -> -- on 495-496 with type as --
	RIKS181301A010A-1.24259-SR_R18.5045212.B180713_A6129.seq_align.txt	|GGGGGAGATGCATAT -> --------------- on 486-500 with type as ---------------
	RIKS181301A010A-2.24259-SR_R18.5045212.B180713_A6130.seq_align.txt	|GGGGAGATG -> --------- on 487-495 with type as ---------
	RIKS181301A010A-3.24259-SR_R18.5045212.B180713_A6131.seq_align.txt	|GGGGAGATG -> --------- on 487-495 with type as ---------
	RIKS181301A010A-5.24259-SR_R18.5045212.B180713_A6133.seq_align.txt	|GGGGAGATG -> --------- on 487-495 with type as ---------;- -> T on 510-510 with type as -
	RIKS181301A010A-7.24259-SR_R18.5045212.B180713_A6135.seq_align.txt	|GGGGAGATG -> --------- on 487-495 with type as ---------
	RIKS181301A010A-8.24259-SR_R18.5045212.B180713_A6136.seq_align.txt	|GGGGAGATGC -> ---------- on 487-496 with type as ----------
	RIKS181301A021A-1.24259-SR_R18.5045212.B180713_A6137.seq_align.txt	|T -> - on 520-520 with type as -
	RIKS181301A021A-2.24259-SR_R18.5045212.B180713_A6138.seq_align.txt	|AGATGCATATCTAACCT -> ----------------- on 491-507 with type as -----------------;T -> G on 512-512 with type as v;T -> C on 523-523 with type as i;C -> G on 527-527 with type as v;A -> T on 533-533 with type as v;T -> C on 538-538 with type as i;T -> G on 541-541 with type as v;CAC -> GCT on 543-545 with type as vvi;A -> T on 552-552 with type as v;A -> C on 554-554 with type as v;CA -> TT on 55…
	RIKS181301A021A-4.24259-SR_R18.5045212.B180713_A6140.seq_align.txt	|GGGGAGATGCATATCTA -> ----------------- on 487-503 with type as -----------------
	RIKS181301A021A-5.24259-SR_R18.5045212.B180713_A6141.seq_align.txt	|GGGGAGATGCATATCTA -> ----------------- on 487-503 with type as -----------------
	RIKS181301A021A-6.24259-SR_R18.5045212.B180713_A6142.seq_align.txt	|GGAGATG -> ------- on 489-495 with type as -------
	RIKS181301A021A-8.24259-SR_R18.5045212.B180713_A6144.seq_align.txt	|GGGGAGATGCATATCTA -> ----------------- on 487-503 with type as -----------------
	RIKS181301A039A-1.24259-SR_R18.5045212.B180713_A6145.seq_align.txt	|GGGGGAGATGCATA -> -------------- on 486-499 with type as --------------;T -> G on 765-765 with type as v
	RIKS181301A039A-3.24259-SR_R18.5045212.B180713_A6147.seq_align.txt	|GAGATGCA -> -------- on 490-497 with type as --------;G -> A on 642-642 with type as i;T -> G on 673-673 with type as v
	RIKS181301A039A-4.24259-SR_R18.5045212.B180713_A6148.seq_align.txt	|GAGATGCA -> -------- on 490-497 with type as --------;--- -> TTT on 520-520 with type as ---
	RIKS181301A039A-5.24259-SR_R18.5045212.B180713_A6149.seq_align.txt	|GAGATGCA -> -------- on 490-497 with type as --------
	RIKS181301A039A-7.24259-SR_R18.5045212.B180713_A6151.seq_align.txt	|GAGATGCA -> -------- on 490-497 with type as --------
	RIKS181301A046A-1.24259-SR_R18.5045212.B180713_A6153.seq_align.txt	|GTAGGGGGAGATG -> ------------- on 483-495 with type as -------------
	RIKS181301A046A-2.24259-SR_R18.5045212.B180713_A6154.seq_align.txt	|GGGGAGATG -> --------- on 487-495 with type as ---------
	RIKS181301A046A-3.24259-SR_R18.5045212.B180713_A6155.seq_align.txt	|GGGGAGATG -> --------- on 487-495 with type as ---------
	RIKS181301A046A-4.24259-SR_R18.5045212.B180713_A6156.seq_align.txt	|GGGGAGATG -> --------- on 487-495 with type as ---------;- -> T on 510-510 with type as -
	RIKS181301A046A-5.24259-SR_R18.5045212.B180713_A6157.seq_align.txt	|GGGGAGATG -> --------- on 487-495 with type as ---------
	RIKS181301A046A-6.24259-SR_R18.5045212.B180713_A6158.seq_align.txt	|GGGGAGATG -> --------- on 487-495 with type as ---------
	RIKS181301A046A-7.24259-SR_R18.5045212.B180713_A6159.seq_align.txt	|GTAGGGGGAGATG -> ------------- on 483-495 with type as -------------
	RIKS181301A046A-8.24259-SR_R18.5045212.B180713_A6160.seq_align.txt	|GGGGAGATG -> --------- on 487-495 with type as ---------
	RIKS181301A051A-1.24259-SR_R18.5045212.B180713_A6161.seq_align.txt	|AGGGGGAGATGCATATCTAACCT -> ----------------------- on 485-507 with type as -----------------------
	RIKS181301A051A-2.24259-SR_R18.5045212.B180713_A6162.seq_align.txt	|AGGGGGAGATGCATATCTAACCT -> ----------------------- on 485-507 with type as -----------------------
	RIKS181301A051A-3.24259-SR_R18.5045212.B180713_A6163.seq_align.txt	|GGGG -> ---- on 487-490 with type as ----
	RIKS181301A051A-5.24259-SR_R18.5045212.B180713_A6165.seq_align.txt	|GGGG -> ---- on 487-490 with type as ----
	RIKS181301A051A-6.24259-SR_R18.5045212.B180713_A6166.seq_align.txt	|AGGGGGAGATGCATATCTAACCT -> ----------------------- on 485-507 with type as -----------------------
	RIKS181301A051A-7.24259-SR_R18.5045212.B180713_A6167.seq_align.txt	|AGGGGGAGATGCATATCTAACCT -> ----------------------- on 485-507 with type as -----------------------
	RIKS181301A051A-8.24259-SR_R18.5045212.B180713_A6168.seq_align.txt	|G -> T on 486-486 with type as v;G -> T on 488-488 with type as v;GGAG -> ---- on 489-492 with type as ----;A -> T on 497-497 with type as v;A -> T on 499-499 with type as v;- -> T on 500-500 with type as -;AA -> TG on 503-504 with type as vi;C -> T on 506-506 with type as i;T -> G on 509-509 with type as v;T -> A on 511-511 with type as v;T -> A on 513-513 with type as v;T -> C on 517-517 with …
	RIKS181301A057A-1.24259-SR_R18.5045212.B180713_A6169.seq_align.txt	|GGGAGATG -> -------- on 488-495 with type as --------
	RIKS181301A057A-2.24259-SR_R18.5045212.B180713_A6170.seq_align.txt	|GGGAGATG -> -------- on 488-495 with type as --------
	RIKS181301A057A-3.24259-SR_R18.5045212.B180713_A6171.seq_align.txt	|GGGAGATG -> -------- on 488-495 with type as --------
	RIKS181301A057A-7.24259-SR_R18.5045212.B180713_A6175.seq_align.txt	|GGGAGATG -> -------- on 488-495 with type as --------
	RIKS181301A064A-1.24259-SR_R18.5045212.B180713_A6177.seq_align.txt	|GTAGGGGGAGATGCA -> --------------- on 483-497 with type as ---------------
	RIKS181301A064A-2.24259-SR_R18.5045212.B180713_A6178.seq_align.txt	|GTAGGGGGAGATGCA -> --------------- on 483-497 with type as ---------------
	RIKS181301A064A-4.24259-SR_R18.5045212.B180713_A6180.seq_align.txt	|AGGGGGAGATG -> ----------- on 485-495 with type as -----------;A -> - on 497-497 with type as -
	RIKS181301A064A-5.24259-SR_R18.5045212.B180713_A6181.seq_align.txt	|GTAGGGGGAGATGCA -> --------------- on 483-497 with type as ---------------
	RIKS181301A064A-6.24259-SR_R18.5045212.B180713_A6182.seq_align.txt	|GC -> -- on 495-496 with type as --
	RIKS181301A064A-7.24259-SR_R18.5045212.B180713_A6183.seq_align.txt	|GTAGGGGGAGATGCA -> --------------- on 483-497 with type as ---------------
	RIKS181301A064A-8.24259-SR_R18.5045212.B180713_A6184.seq_align.txt	|GC -> -- on 495-496 with type as --
	RIKS181301A065A-1.24259-SR_R18.5045212.B180713_A6185.seq_align.txt	|GGGAGATG -> -------- on 488-495 with type as --------
	RIKS181301A065A-2.24259-SR_R18.5045212.B180713_A6186.seq_align.txt	|GGGGGAGATG -> ---------- on 486-495 with type as ----------;- -> T on 510-510 with type as -
	RIKS181301A065A-3.24259-SR_R18.5045212.B180713_A6187.seq_align.txt	|GGGGGAGATG -> ---------- on 486-495 with type as ----------
	RIKS181301A065A-6.24259-SR_R18.5045212.B180713_A6190.seq_align.txt	|GGGGGAGATG -> ---------- on 486-495 with type as ----------;- -> T on 510-510 with type as -
	RIKS181301A065A-7.24259-SR_R18.5045212.B180713_A6191.seq_align.txt	|GGGAGATG -> -------- on 488-495 with type as --------
	RIKS181301A065A-8.24259-SR_R18.5045212.B180713_A6192.seq_align.txt	|GGGAGATG -> -------- on 488-495 with type as --------
	RIKS181301A070A-1.24259-SR_R18.5045212.B180713_A6193.seq_align.txt	|GGGGAGATG -> --------- on 487-495 with type as ---------
	RIKS181301A070A-2.24259-SR_R18.5045212.B180713_A6194.seq_align.txt	|GGGAGATGCA -> ---------- on 488-497 with type as ----------
	RIKS181301A070A-3.24259-SR_R18.5045212.B180713_A6195.seq_align.txt	|GGGGAGATG -> --------- on 487-495 with type as ---------
	RIKS181301A070A-4.24259-SR_R18.5045212.B180713_A6196.seq_align.txt	|GGGAGATGCA -> ---------- on 488-497 with type as ----------
	RIKS181301A070A-5.24259-SR_R18.5045223.B180713_A6197.seq_align.txt	|GGGAGATGCA -> ---------- on 488-497 with type as ----------
	RIKS181301A070A-6.24259-SR_R18.5045223.B180713_A6198.seq_align.txt	|GGGAGATGCA -> ---------- on 488-497 with type as ----------
	RIKS181301A070A-7.24259-SR_R18.5045223.B180713_A6199.seq_align.txt	|GGGAGATGCA -> ---------- on 488-497 with type as ----------
	RIKS181301A070A-8.24259-SR_R18.5045223.B180713_A6200.seq_align.txt	|GGGGAGATG -> --------- on 487-495 with type as ---------
	RIKS181302A071A-1.24259-SR_R18.5045223.B180713_A6201.seq_align.txt	|CAGTAGGGGGAGATGCA -> ----------------- on 481-497 with type as -----------------
	RIKS181302A071A-2.24259-SR_R18.5045223.B180713_A6202.seq_align.txt	|Unaligned fragments on contig 1 bp. which was on 438 to 502 on the reference.
	RIKS181302A071A-3.24259-SR_R18.5045223.B180713_A6203.seq_align.txt	|CAGTAGGGGGAGATGCA -> ----------------- on 481-497 with type as -----------------
	RIKS181302A071A-4.24259-SR_R18.5045223.B180713_A6204.seq_align.txt	|Unaligned fragments on contig 1 bp. which was on 438 to 502 on the reference.
	RIKS181302A071A-5.24259-SR_R18.5045223.B180713_A6205.seq_align.txt	|- -> T on 520-520 with type as -;Unaligned fragments on contig 1 bp. which was on 438 to 502 on the reference.
	RIKS181302A071A-6.24259-SR_R18.5045223.B180713_A6206.seq_align.txt	|CAGTAGGGGGAGATGCA -> ----------------- on 481-497 with type as -----------------
	RIKS181302A071A-7.24259-SR_R18.5045223.B180713_A6207.seq_align.txt	|Unaligned fragments on contig 1 bp. which was on 438 to 502 on the reference.
	RIKS181302A071A-8.24259-SR_R18.5045223.B180713_A6208.seq_align.txt	|CAGTAGGGGGAGATGCA -> ----------------- on 481-497 with type as -----------------
	RIKS181302A077A-1.24259-SR_R18.5045223.B180713_A6209.seq_align.txt	|Unaligned fragments on contig 1 bp. which was on 438 to 502 on the reference.
	RIKS181302A077A-2.24259-SR_R18.5045223.B180713_A6210.seq_align.txt	|AGGGGGA -> ------- on 485-491 with type as -------;A -> T on 493-493 with type as v;G -> - on 495-495 with type as -;C -> T on 496-496 with type as i;A -> - on 843-843 with type as -
	RIKS181302A077A-3.24259-SR_R18.5045223.B180713_A6211.seq_align.txt	|GGGGGAGATG -> ---------- on 486-495 with type as ----------
	RIKS181302A077A-4.24259-SR_R18.5045223.B180713_A6212.seq_align.txt	|GGGGGAGATG -> ---------- on 486-495 with type as ----------
	RIKS181302A077A-5.24259-SR_R18.5045223.B180713_A6213.seq_align.txt	|GGGGGAGATG -> ---------- on 486-495 with type as ----------
	RIKS181302A077A-6.24259-SR_R18.5045223.B180713_A6214.seq_align.txt	|GGGGAGATGCATATCTA -> ----------------- on 487-503 with type as -----------------
	RIKS181302A077A-8.24259-SR_R18.5045223.B180713_A6216.seq_align.txt	|GGGGGAGATG -> ---------- on 486-495 with type as ----------
	RIKS181302A118A-1.24259-SR_R18.5045223.B180713_A6217.seq_align.txt	|GGGGAG -> ------ on 487-492 with type as ------
	RIKS181302A118A-2.24259-SR_R18.5045223.B180713_A6218.seq_align.txt	|GGGGAG -> ------ on 487-492 with type as ------
	RIKS181302A118A-3.24259-SR_R18.5045223.B180713_A6219.seq_align.txt	|GGGGAG -> ------ on 487-492 with type as ------
	RIKS181302A118A-4.24259-SR_R18.5045223.B180713_A6220.seq_align.txt	|GGGGAG -> ------ on 487-492 with type as ------
	RIKS181302A118A-5.24259-SR_R18.5045223.B180713_A6221.seq_align.txt	|GGGGAGATGC -> ---------- on 487-496 with type as ----------
	RIKS181302A118A-6.24259-SR_R18.5045223.B180713_A6222.seq_align.txt	|GGGGAGATGC -> ---------- on 487-496 with type as ----------
	RIKS181302A118A-8.24259-SR_R18.5045223.B180713_A6224.seq_align.txt	|GGGGAG -> ------ on 487-492 with type as ------;- -> T on 520-520 with type as -
	RIKS181302A131A-1.24259-SR_R18.5045223.B180713_A6225.seq_align.txt	|GGGGAGATGC -> ---------- on 487-496 with type as ----------
	RIKS181302A131A-2.24259-SR_R18.5045223.B180713_A6226.seq_align.txt	|GAGATG -> ------ on 490-495 with type as ------
	RIKS181302A131A-3.24259-SR_R18.5045223.B180713_A6227.seq_align.txt	|GAGATG -> ------ on 490-495 with type as ------
	RIKS181302A131A-5.24259-SR_R18.5045223.B180713_A6229.seq_align.txt	|GAGATG -> ------ on 490-495 with type as ------
	RIKS181302A131A-6.24259-SR_R18.5045223.B180713_A6230.seq_align.txt	|GAGATG -> ------ on 490-495 with type as ------
	RIKS181302A131A-7.24259-SR_R18.5045223.B180713_A6231.seq_align.txt	|GGGGAGATGC -> ---------- on 487-496 with type as ----------
	RIKS181302A131A-8.24259-SR_R18.5045223.B180713_A6232.seq_align.txt	|GAGATG -> ------ on 490-495 with type as ------
	RIKS181303A001A-1.24259-SR_R18.5045223.B180713_A6233.seq_align.txt	|AGGGGGAGATGCA -> ------------- on 485-497 with type as -------------
	RIKS181303A001A-2.24259-SR_R18.5045223.B180713_A6234.seq_align.txt	|AGGGGGAGATGCA -> ------------- on 485-497 with type as -------------
	RIKS181303A001A-5.24259-SR_R18.5045223.B180713_A6237.seq_align.txt	|- -> T on 520-520 with type as -
	RIKS181303A001A-6.24259-SR_R18.5045223.B180713_A6238.seq_align.txt	|AGGGGGAGATGCA -> ------------- on 485-497 with type as -------------;- -> T on 510-510 with type as -
	RIKS181303A014A-1.24259-SR_R18.5045223.B180713_A6241.seq_align.txt	|GGGAGATG -> -------- on 488-495 with type as --------;- -> T on 510-510 with type as -
	RIKS181303A014A-3.24259-SR_R18.5045223.B180713_A6243.seq_align.txt	|GGGGAGATGC -> ---------- on 487-496 with type as ----------
	RIKS181303A014A-4.24259-SR_R18.5045223.B180713_A6244.seq_align.txt	|GGGAGATG -> -------- on 488-495 with type as --------
	RIKS181303A014A-6.24259-SR_R18.5045223.B180713_A6246.seq_align.txt	|GGGAGATG -> -------- on 488-495 with type as --------
	RIKS181303A014A-7.24259-SR_R18.5045223.B180713_A6247.seq_align.txt	|GGGAGATG -> -------- on 488-495 with type as --------
	RIKS181303A014A-8.24259-SR_R18.5045223.B180713_A6248.seq_align.txt	|GGGAGATG -> -------- on 488-495 with type as --------
	RIKS180900A042A-3.24259-SR_R18.5045194.B180713_A6027.seq_align.txt	Wild-Type
	RIKS180901A008A-1.24259-SR_R18.5045194.B180713_A6041.seq_align.txt	Wild-Type
	RIKS180901A008A-2.24259-SR_R18.5045194.B180713_A6042.seq_align.txt	Wild-Type
	RIKS180901A008A-5.24259-SR_R18.5045194.B180713_A6045.seq_align.txt	Wild-Type
	RIKS180901A039A-3.24259-SR_R18.5045194.B180713_A6083.seq_align.txt	Wild-Type
	RIKS180901A039A-6.24259-SR_R18.5045194.B180713_A6086.seq_align.txt	Wild-Type
	RIKS181301A010A-4.24259-SR_R18.5045212.B180713_A6132.seq_align.txt	Wild-Type
	RIKS181301A021A-3.24259-SR_R18.5045212.B180713_A6139.seq_align.txt	Wild-Type
	RIKS181301A021A-7.24259-SR_R18.5045212.B180713_A6143.seq_align.txt	Wild-Type
	RIKS181301A039A-2.24259-SR_R18.5045212.B180713_A6146.seq_align.txt	Wild-Type
	RIKS181301A039A-6.24259-SR_R18.5045212.B180713_A6150.seq_align.txt	Wild-Type
	RIKS181301A039A-8.24259-SR_R18.5045212.B180713_A6152.seq_align.txt	Wild-Type
	RIKS181301A057A-8.24259-SR_R18.5045212.B180713_A6176.seq_align.txt	Wild-Type
	RIKS181303A001A-3.24259-SR_R18.5045223.B180713_A6235.seq_align.txt	Wild-Type
	RIKS181303A001A-4.24259-SR_R18.5045223.B180713_A6236.seq_align.txt	Wild-Type
	RIKS181303A001A-7.24259-SR_R18.5045223.B180713_A6239.seq_align.txt	Wild-Type

## Sheet: Data_Source (2)
Sample	clone	genotype
RIKS180900A009A	RIKS180900A009A-1.24259-SR_R18.5045194.B180713_A6001.seq_align.txt	|TAGGGGGAGAT -> ----------- on 484-494 with type as -----------
RIKS180900A009A	RIKS180900A009A-4.24259-SR_R18.5045194.B180713_A6004.seq_align.txt	|GGGGAGATG -> --------- on 487-495 with type as ---------
RIKS180900A009A	RIKS180900A009A-5.24259-SR_R18.5045194.B180713_A6005.seq_align.txt	|GGGGAGATG -> --------- on 487-495 with type as ---------
RIKS180900A009A	RIKS180900A009A-6.24259-SR_R18.5045194.B180713_A6006.seq_align.txt	|TAGGGGGAGAT -> ----------- on 484-494 with type as -----------
RIKS180900A009A	RIKS180900A009A-7.24259-SR_R18.5045194.B180713_A6007.seq_align.txt	|GGGGAGATG -> --------- on 487-495 with type as ---------
RIKS180900A009A	RIKS180900A009A-8.24259-SR_R18.5045194.B180713_A6008.seq_align.txt	|TAGGGGGAGAT -> ----------- on 484-494 with type as -----------
RIKS180900A014A	RIKS180900A014A-1.24259-SR_R18.5045194.B180713_A6009.seq_align.txt	|GGGAGATGC -> --------- on 488-496 with type as ---------
RIKS180900A014A	RIKS180900A014A-2.24259-SR_R18.5045194.B180713_A6010.seq_align.txt	|GGGAGATGC -> --------- on 488-496 with type as ---------
RIKS180900A014A	RIKS180900A014A-3.24259-SR_R18.5045194.B180713_A6011.seq_align.txt	|GGGAGATGC -> --------- on 488-496 with type as ---------
RIKS180900A014A	RIKS180900A014A-5.24259-SR_R18.5045194.B180713_A6013.seq_align.txt	|GGGAGATGC -> --------- on 488-496 with type as ---------
RIKS180900A014A	RIKS180900A014A-6.24259-SR_R18.5045194.B180713_A6014.seq_align.txt	|GGGAGATGC -> --------- on 488-496 with type as ---------
RIKS180900A014A	RIKS180900A014A-7.24259-SR_R18.5045194.B180713_A6015.seq_align.txt	|GGGAGATGC -> --------- on 488-496 with type as ---------
RIKS180900A030A	RIKS180900A030A-1.24259-SR_R18.5045194.B180713_A6017.seq_align.txt	|GGGGAGAT -> -------- on 487-494 with type as --------;G -> C on 495-495 with type as v
RIKS180900A030A	RIKS180900A030A-2.24259-SR_R18.5045194.B180713_A6018.seq_align.txt	|GGGAGATGCA -> ---------- on 488-497 with type as ----------
RIKS180900A030A	RIKS180900A030A-4.24259-SR_R18.5045194.B180713_A6020.seq_align.txt	|GGGGAGAT -> -------- on 487-494 with type as --------;G -> C on 495-495 with type as v
RIKS180900A030A	RIKS180900A030A-5.24259-SR_R18.5045194.B180713_A6021.seq_align.txt	|GGGGAGAT -> -------- on 487-494 with type as --------;G -> C on 495-495 with type as v
RIKS180900A030A	RIKS180900A030A-6.24259-SR_R18.5045194.B180713_A6022.seq_align.txt	|GGGAGATGCA -> ---------- on 488-497 with type as ----------
RIKS180900A030A	RIKS180900A030A-7.24259-SR_R18.5045194.B180713_A6023.seq_align.txt	|GGGAGATGCA -> ---------- on 488-497 with type as ----------
RIKS180900A030A	RIKS180900A030A-8.24259-SR_R18.5045194.B180713_A6024.seq_align.txt	|A -> - on 388-388 with type as -;GGGGAGAT -> -------- on 487-494 with type as --------;G -> C on 495-495 with type as v
RIKS180900A042A	RIKS180900A042A-4.24259-SR_R18.5045194.B180713_A6028.seq_align.txt	|GATGCA -> ------ on 492-497 with type as ------
RIKS180900A042A	RIKS180900A042A-6.24259-SR_R18.5045194.B180713_A6030.seq_align.txt	|G -> T on 492-492 with type as v
RIKS180900A042A	RIKS180900A042A-7.24259-SR_R18.5045194.B180713_A6031.seq_align.txt	|GGGGGAGATGCATATCTA -> ------------------ on 486-503 with type as ------------------
RIKS180900A042A	RIKS180900A042A-8.24259-SR_R18.5045194.B180713_A6032.seq_align.txt	|GATGCA -> ------ on 492-497 with type as ------
RIKS180900A053A	RIKS180900A053A-1.24259-SR_R18.5045194.B180713_A6033.seq_align.txt	|GGGGAGATG -> --------- on 487-495 with type as ---------
RIKS180900A053A	RIKS180900A053A-2.24259-SR_R18.5045194.B180713_A6034.seq_align.txt	|GGGGAGATG -> --------- on 487-495 with type as ---------
RIKS180900A053A	RIKS180900A053A-3.24259-SR_R18.5045194.B180713_A6035.seq_align.txt	|GGGGAGATG -> --------- on 487-495 with type as ---------
RIKS180900A053A	RIKS180900A053A-4.24259-SR_R18.5045194.B180713_A6036.seq_align.txt	|GGGGAGATG -> --------- on 487-495 with type as ---------
RIKS180900A053A	RIKS180900A053A-5.24259-SR_R18.5045194.B180713_A6037.seq_align.txt	|GGGGAGATG -> --------- on 487-495 with type as ---------
RIKS180900A053A	RIKS180900A053A-6.24259-SR_R18.5045194.B180713_A6038.seq_align.txt	|GGGAGATG -> -------- on 488-495 with type as --------
RIKS180900A053A	RIKS180900A053A-8.24259-SR_R18.5045194.B180713_A6040.seq_align.txt	|GGGGAGATG -> --------- on 487-495 with type as ---------
RIKS180901A008A	RIKS180901A008A-3.24259-SR_R18.5045194.B180713_A6043.seq_align.txt	|AGATG -> ----- on 491-495 with type as -----
RIKS180901A008A	RIKS180901A008A-4.24259-SR_R18.5045194.B180713_A6044.seq_align.txt	|AGATG -> ----- on 491-495 with type as -----
RIKS180901A008A	RIKS180901A008A-6.24259-SR_R18.5045194.B180713_A6046.seq_align.txt	|GGGGGAGATGCA -> ------------ on 486-497 with type as ------------
RIKS180901A008A	RIKS180901A008A-8.24259-SR_R18.5045194.B180713_A6048.seq_align.txt	|A -> - on 388-388 with type as -;AGATG -> ----- on 491-495 with type as -----
RIKS180901A022A	RIKS180901A022A-1.24259-SR_R18.5045194.B180713_A6049.seq_align.txt	|GGAGATGCATATCTAAC -> ----------------- on 489-505 with type as -----------------
RIKS180901A022A	RIKS180901A022A-2.24259-SR_R18.5045194.B180713_A6050.seq_align.txt	|GGAGATGCATATCTAAC -> ----------------- on 489-505 with type as -----------------
RIKS180901A022A	RIKS180901A022A-3.24259-SR_R18.5045194.B180713_A6051.seq_align.txt	|GGGGGAGATGCATA -> -------------- on 486-499 with type as --------------
RIKS180901A022A	RIKS180901A022A-4.24259-SR_R18.5045194.B180713_A6052.seq_align.txt	|GGGGGAGATGCATA -> -------------- on 486-499 with type as --------------
RIKS180901A022A	RIKS180901A022A-5.24259-SR_R18.5045194.B180713_A6053.seq_align.txt	|GGAGATG -> ------- on 489-495 with type as -------;A -> - on 497-497 with type as -;A -> - on 499-499 with type as -;C -> - on 501-501 with type as -;A -> G on 503-503 with type as i;ACC -> --- on 504-506 with type as ---
RIKS180901A022A	RIKS180901A022A-6.24259-SR_R18.5045194.B180713_A6054.seq_align.txt	|GGAGATGCATATCTAAC -> ----------------- on 489-505 with type as -----------------
RIKS180901A022A	RIKS180901A022A-8.24259-SR_R18.5045194.B180713_A6056.seq_align.txt	|GGAGATGCATATCTAAC -> ----------------- on 489-505 with type as -----------------
RIKS180901A025A	RIKS180901A025A-1.24259-SR_R18.5045194.B180713_A6057.seq_align.txt	|GGAGATG -> ------- on 489-495 with type as -------
RIKS180901A025A	RIKS180901A025A-2.24259-SR_R18.5045194.B180713_A6058.seq_align.txt	|GGGG -> ---- on 487-490 with type as ----;G -> T on 492-492 with type as v;GC -> CT on 495-496 with type as vi;TATC -> ACCT on 498-501 with type as vvii;AACC -> TGTT on 503-506 with type as viii
RIKS180901A025A	RIKS180901A025A-3.24259-SR_R18.5045194.B180713_A6059.seq_align.txt	|GGGGAGATGC -> ---------- on 487-496 with type as ----------
RIKS180901A025A	RIKS180901A025A-4.24259-SR_R18.5045194.B180713_A6060.seq_align.txt	|A -> - on 388-388 with type as -;GGAGATG -> ------- on 489-495 with type as -------
RIKS180901A025A	RIKS180901A025A-5.24259-SR_R18.5045194.B180713_A6061.seq_align.txt	|GGGGAGATGC -> ---------- on 487-496 with type as ----------
RIKS180901A025A	RIKS180901A025A-7.24259-SR_R18.5045194.B180713_A6063.seq_align.txt	|GGAGATG -> ------- on 489-495 with type as -------
RIKS180901A025A	RIKS180901A025A-8.24259-SR_R18.5045194.B180713_A6064.seq_align.txt	|GGAGATG -> ------- on 489-495 with type as -------
RIKS180901A033A	RIKS180901A033A-1.24259-SR_R18.5045194.B180713_A6065.seq_align.txt	|GTAGGGGGAGATGCA -> --------------- on 483-497 with type as ---------------
RIKS180901A033A	RIKS180901A033A-3.24259-SR_R18.5045194.B180713_A6067.seq_align.txt	|GTAGGGGGAGATGCA -> --------------- on 483-497 with type as ---------------
RIKS180901A033A	RIKS180901A033A-5.24259-SR_R18.5045194.B180713_A6069.seq_align.txt	|GTAGGGGGAGATGCA -> --------------- on 483-497 with type as ---------------
RIKS180901A033A	RIKS180901A033A-6.24259-SR_R18.5045194.B180713_A6070.seq_align.txt	|T -> C on 250-250 with type as i;T -> C on 256-256 with type as i;T -> A on 259-259 with type as v;GG -> TC on 263-264 with type as vv;T -> G on 273-273 with type as v;A -> G on 275-275 with type as i;AAG -> GGT on 280-282 with type as iiv;T -> A on 287-287 with type as v;CA -> TC on 291-292 with type as iv;T -> C on 294-294 with type as i;G -> T on 297-297 with type as v;GGA -> TTG on 305-307 w…
RIKS180901A033A	RIKS180901A033A-7.24259-SR_R18.5045194.B180713_A6071.seq_align.txt	|GGGGAGA -> ------- on 487-493 with type as -------;G -> - on 495-495 with type as -
RIKS180901A033A	RIKS180901A033A-8.24259-SR_R18.5045194.B180713_A6072.seq_align.txt	|GTAGGGGGAGATGCA -> --------------- on 483-497 with type as ---------------
RIKS180901A034A	RIKS180901A034A-1.24259-SR_R18.5045194.B180713_A6073.seq_align.txt	|AGGGGGAGATGCATATCTAA -> -------------------- on 485-504 with type as --------------------
RIKS180901A034A	RIKS180901A034A-2.24259-SR_R18.5045194.B180713_A6074.seq_align.txt	|AGGGGGAGATGCATATCTAA -> -------------------- on 485-504 with type as --------------------
RIKS180901A034A	RIKS180901A034A-3.24259-SR_R18.5045194.B180713_A6075.seq_align.txt	|GGGAGATG -> -------- on 488-495 with type as --------
RIKS180901A034A	RIKS180901A034A-4.24259-SR_R18.5045194.B180713_A6076.seq_align.txt	|AGGGGGAGATGCATATCTAA -> -------------------- on 485-504 with type as --------------------
RIKS180901A034A	RIKS180901A034A-5.24259-SR_R18.5045194.B180713_A6077.seq_align.txt	|GGGAGATG -> -------- on 488-495 with type as --------
RIKS180901A034A	RIKS180901A034A-6.24259-SR_R18.5045194.B180713_A6078.seq_align.txt	|GGGAGATG -> -------- on 488-495 with type as --------
RIKS180901A034A	RIKS180901A034A-7.24259-SR_R18.5045194.B180713_A6079.seq_align.txt	|AGGGGGAGATGCATATCTAA -> -------------------- on 485-504 with type as --------------------
RIKS180901A034A	RIKS180901A034A-8.24259-SR_R18.5045194.B180713_A6080.seq_align.txt	|AGGGGGAGATGCATATCTAA -> -------------------- on 485-504 with type as --------------------
RIKS180901A039A	RIKS180901A039A-1.24259-SR_R18.5045194.B180713_A6081.seq_align.txt	|GGGGAGATGCATAT -> -------------- on 487-500 with type as --------------
RIKS180901A039A	RIKS180901A039A-2.24259-SR_R18.5045194.B180713_A6082.seq_align.txt	|GGGAGATG -> -------- on 488-495 with type as --------
RIKS180901A039A	RIKS180901A039A-4.24259-SR_R18.5045194.B180713_A6084.seq_align.txt	|GGGGAGATGCATAT -> -------------- on 487-500 with type as --------------
RIKS180901A039A	RIKS180901A039A-5.24259-SR_R18.5045194.B180713_A6085.seq_align.txt	|A -> - on 388-388 with type as -;GGGGAGATGCATAT -> -------------- on 487-500 with type as --------------
RIKS180901A039A	RIKS180901A039A-7.24259-SR_R18.5045194.B180713_A6087.seq_align.txt	|GTAGGGGGAGATGCA -> --------------- on 483-497 with type as ---------------
RIKS180901A039A	RIKS180901A039A-8.24259-SR_R18.5045194.B180713_A6088.seq_align.txt	|GGAGATG -> ------- on 489-495 with type as -------;A -> - on 497-497 with type as -;A -> - on 499-499 with type as -;CTAACC -> ------ on 501-506 with type as ------;T -> G on 508-508 with type as v
RIKS180901A046A	RIKS180901A046A-1.24259-SR_R18.5045194.B180713_A6089.seq_align.txt	|GTACAGTAGGGGGAGATGC -> ------------------- on 478-496 with type as -------------------
RIKS180901A046A	RIKS180901A046A-2.24259-SR_R18.5045194.B180713_A6090.seq_align.txt	|GTACAGTAGGGGGAGATGC -> ------------------- on 478-496 with type as -------------------
RIKS180901A046A	RIKS180901A046A-3.24259-SR_R18.5045194.B180713_A6091.seq_align.txt	|GGGGGAGA -> -------- on 486-493 with type as --------;G -> - on 495-495 with type as -
RIKS180901A046A	RIKS180901A046A-4.24259-SR_R18.5045194.B180713_A6092.seq_align.txt	|GTACAGTAGGGGGAGATGC -> ------------------- on 478-496 with type as -------------------
RIKS180901A046A	RIKS180901A046A-5.24259-SR_R18.5045194.B180713_A6093.seq_align.txt	|GTACAGTAGGGGGAGATGC -> ------------------- on 478-496 with type as -------------------
RIKS180901A046A	RIKS180901A046A-6.24259-SR_R18.5045194.B180713_A6094.seq_align.txt	|GTACAGTAGGGGGAGATGC -> ------------------- on 478-496 with type as -------------------
RIKS180901A046A	RIKS180901A046A-7.24259-SR_R18.5045194.B180713_A6095.seq_align.txt	|GTACAGTAGGGGGAGATGC -> ------------------- on 478-496 with type as -------------------
RIKS180901A046A	RIKS180901A046A-8.24259-SR_R18.5045194.B180713_A6096.seq_align.txt	|GGGGGAGA -> -------- on 486-493 with type as --------;G -> - on 495-495 with type as -
RIKS180901A049A	RIKS180901A049A-1.24259-SR_R18.5045194.B180713_A6097.seq_align.txt	|GGGGAGATG -> --------- on 487-495 with type as ---------
RIKS180901A049A	RIKS180901A049A-3.24259-SR_R18.5045212.B180713_A6099.seq_align.txt	|GGGGAGATG -> --------- on 487-495 with type as ---------
RIKS180901A049A	RIKS180901A049A-4.24259-SR_R18.5045212.B180713_A6100.seq_align.txt	|GGGGAGATG -> --------- on 487-495 with type as ---------
RIKS180901A049A	RIKS180901A049A-5.24259-SR_R18.5045212.B180713_A6101.seq_align.txt	|GGGGAGATG -> --------- on 487-495 with type as ---------
RIKS180901A049A	RIKS180901A049A-6.24259-SR_R18.5045212.B180713_A6102.seq_align.txt	|GGAGATG -> ------- on 489-495 with type as -------
RIKS180901A049A	RIKS180901A049A-7.24259-SR_R18.5045212.B180713_A6103.seq_align.txt	|GGAGATG -> ------- on 489-495 with type as -------
RIKS180901A049A	RIKS180901A049A-8.24259-SR_R18.5045212.B180713_A6104.seq_align.txt	|GGAGATG -> ------- on 489-495 with type as -------
RIKS180901A061A	RIKS180901A061A-1.24259-SR_R18.5045212.B180713_A6105.seq_align.txt	|GGGAGATGCAT -> ----------- on 488-498 with type as -----------
RIKS180901A061A	RIKS180901A061A-2.24259-SR_R18.5045212.B180713_A6106.seq_align.txt	|TAGGGGGAGATGC -> ------------- on 484-496 with type as -------------
RIKS180901A061A	RIKS180901A061A-3.24259-SR_R18.5045212.B180713_A6107.seq_align.txt	|TAGGGGGAGATGC -> ------------- on 484-496 with type as -------------
RIKS180901A061A	RIKS180901A061A-4.24259-SR_R18.5045212.B180713_A6108.seq_align.txt	|TAGGGGGAGATGC -> ------------- on 484-496 with type as -------------
RIKS180901A061A	RIKS180901A061A-5.24259-SR_R18.5045212.B180713_A6109.seq_align.txt	|TAGGGGGAGATGC -> ------------- on 484-496 with type as -------------;-- -> CA on 96-96 with type as --;;
RIKS180901A061A	RIKS180901A061A-6.24259-SR_R18.5045212.B180713_A6110.seq_align.txt	|GGGAGATGC -> --------- on 488-496 with type as ---------
RIKS180901A061A	RIKS180901A061A-7.24259-SR_R18.5045212.B180713_A6111.seq_align.txt	|TAGGGGGAGATGC -> ------------- on 484-496 with type as -------------
RIKS180901A061A	RIKS180901A061A-8.24259-SR_R18.5045212.B180713_A6112.seq_align.txt	|TAGGGGGAGATGC -> ------------- on 484-496 with type as -------------
RIKS181300A021A	RIKS181300A021A-1.24259-SR_R18.5045212.B180713_A6113.seq_align.txt	|GGGG -> ---- on 487-490 with type as ----;GATG -> ---- on 492-495 with type as ----
RIKS181300A021A	RIKS181300A021A-2.24259-SR_R18.5045212.B180713_A6114.seq_align.txt	|AGGGGGAGAT -> ---------- on 485-494 with type as ----------
RIKS181300A021A	RIKS181300A021A-3.24259-SR_R18.5045212.B180713_A6115.seq_align.txt	|AGGGGGAGAT -> ---------- on 485-494 with type as ----------
RIKS181300A021A	RIKS181300A021A-4.24259-SR_R18.5045212.B180713_A6116.seq_align.txt	|GGGG -> ---- on 487-490 with type as ----;GATG -> ---- on 492-495 with type as ----
RIKS181300A021A	RIKS181300A021A-5.24259-SR_R18.5045212.B180713_A6117.seq_align.txt	|AGGGGGAGAT -> ---------- on 485-494 with type as ----------
RIKS181300A021A	RIKS181300A021A-6.24259-SR_R18.5045212.B180713_A6118.seq_align.txt	|GGGG -> ---- on 487-490 with type as ----;GATG -> ---- on 492-495 with type as ----
RIKS181300A021A	RIKS181300A021A-7.24259-SR_R18.5045212.B180713_A6119.seq_align.txt	|AGGGGGAGAT -> ---------- on 485-494 with type as ----------
RIKS181300A021A	RIKS181300A021A-8.24259-SR_R18.5045212.B180713_A6120.seq_align.txt	|AGGGGGAGAT -> ---------- on 485-494 with type as ----------
RIKS181301A004A	RIKS181301A004A-1.24259-SR_R18.5045212.B180713_A6121.seq_align.txt	|GCATA -> ----- on 495-499 with type as -----;C -> - on 501-501 with type as -
RIKS181301A004A	RIKS181301A004A-2.24259-SR_R18.5045212.B180713_A6122.seq_align.txt	|T -> A on 468-468 with type as v;TTGGTGGTGT -> ---------- on 470-479 with type as ----------;C -> A on 481-481 with type as v;GT -> AA on 483-484 with type as iv;GGGGG -> ----- on 486-490 with type as -----;T -> A on 494-494 with type as v;GC -> -- on 495-496 with type as --
RIKS181301A004A	RIKS181301A004A-3.24259-SR_R18.5045212.B180713_A6123.seq_align.txt	|CTTTTGGTGGT -> ----------- on 467-477 with type as -----------;T -> A on 479-479 with type as v;C -> A on 481-481 with type as v;GT -> AA on 483-484 with type as iv;G -> A on 486-486 with type as i;GGGG -> ---- on 487-490 with type as ----;T -> A on 494-494 with type as v;GC -> -- on 495-496 with type as --
RIKS181301A004A	RIKS181301A004A-4.24259-SR_R18.5045212.B180713_A6124.seq_align.txt	|CTTTTGGTGGT -> ----------- on 467-477 with type as -----------;T -> A on 479-479 with type as v;C -> A on 481-481 with type as v;GT -> AA on 483-484 with type as iv;G -> A on 486-486 with type as i;GGGG -> ---- on 487-490 with type as ----;T -> A on 494-494 with type as v;GC -> -- on 495-496 with type as --
RIKS181301A004A	RIKS181301A004A-5.24259-SR_R18.5045212.B180713_A6125.seq_align.txt	|CTTTTGGTGGT -> ----------- on 467-477 with type as -----------;T -> A on 479-479 with type as v;C -> A on 481-481 with type as v;GT -> AA on 483-484 with type as iv;G -> A on 486-486 with type as i;GGGG -> ---- on 487-490 with type as ----;T -> A on 494-494 with type as v;GC -> -- on 495-496 with type as --
RIKS181301A004A	RIKS181301A004A-6.24259-SR_R18.5045212.B180713_A6126.seq_align.txt	|CTTTTGGTG -> --------- on 467-475 with type as ---------;TGT -> AAA on 477-479 with type as viv;C -> A on 481-481 with type as v;GT -> AA on 483-484 with type as iv;GGGGG -> ----- on 486-490 with type as -----;T -> A on 494-494 with type as v;GC -> -- on 495-496 with type as --
RIKS181301A004A	RIKS181301A004A-7.24259-SR_R18.5045212.B180713_A6127.seq_align.txt	|GCATA -> ----- on 495-499 with type as -----;C -> - on 501-501 with type as -
RIKS181301A004A	RIKS181301A004A-8.24259-SR_R18.5045212.B180713_A6128.seq_align.txt	|CTTTTGGTGGT -> ----------- on 467-477 with type as -----------;T -> A on 479-479 with type as v;C -> A on 481-481 with type as v;GT -> AA on 483-484 with type as iv;G -> A on 486-486 with type as i;GGGG -> ---- on 487-490 with type as ----;T -> A on 494-494 with type as v;GC -> -- on 495-496 with type as --
RIKS181301A010A	RIKS181301A010A-1.24259-SR_R18.5045212.B180713_A6129.seq_align.txt	|GGGGGAGATGCATAT -> --------------- on 486-500 with type as ---------------
RIKS181301A010A	RIKS181301A010A-2.24259-SR_R18.5045212.B180713_A6130.seq_align.txt	|GGGGAGATG -> --------- on 487-495 with type as ---------
RIKS181301A010A	RIKS181301A010A-3.24259-SR_R18.5045212.B180713_A6131.seq_align.txt	|GGGGAGATG -> --------- on 487-495 with type as ---------
RIKS181301A010A	RIKS181301A010A-5.24259-SR_R18.5045212.B180713_A6133.seq_align.txt	|GGGGAGATG -> --------- on 487-495 with type as ---------
RIKS181301A010A	RIKS181301A010A-7.24259-SR_R18.5045212.B180713_A6135.seq_align.txt	|GGGGAGATG -> --------- on 487-495 with type as ---------
RIKS181301A010A	RIKS181301A010A-8.24259-SR_R18.5045212.B180713_A6136.seq_align.txt	|GGGGAGATGC -> ---------- on 487-496 with type as ----------
RIKS181301A021A	RIKS181301A021A-2.24259-SR_R18.5045212.B180713_A6138.seq_align.txt	|AGATGCATATCTAACCT -> ----------------- on 491-507 with type as -----------------
RIKS181301A021A	RIKS181301A021A-4.24259-SR_R18.5045212.B180713_A6140.seq_align.txt	|GGGGAGATGCATATCTA -> ----------------- on 487-503 with type as -----------------
RIKS181301A021A	RIKS181301A021A-5.24259-SR_R18.5045212.B180713_A6141.seq_align.txt	|GGGGAGATGCATATCTA -> ----------------- on 487-503 with type as -----------------
RIKS181301A021A	RIKS181301A021A-6.24259-SR_R18.5045212.B180713_A6142.seq_align.txt	|GGAGATG -> ------- on 489-495 with type as -------
RIKS181301A021A	RIKS181301A021A-8.24259-SR_R18.5045212.B180713_A6144.seq_align.txt	|GGGGAGATGCATATCTA -> ----------------- on 487-503 with type as -----------------
RIKS181301A039A	RIKS181301A039A-1.24259-SR_R18.5045212.B180713_A6145.seq_align.txt	|GGGGGAGATGCATA -> -------------- on 486-499 with type as --------------
RIKS181301A039A	RIKS181301A039A-3.24259-SR_R18.5045212.B180713_A6147.seq_align.txt	|GAGATGCA -> -------- on 490-497 with type as --------
RIKS181301A039A	RIKS181301A039A-4.24259-SR_R18.5045212.B180713_A6148.seq_align.txt	|GAGATGCA -> -------- on 490-497 with type as --------
RIKS181301A039A	RIKS181301A039A-5.24259-SR_R18.5045212.B180713_A6149.seq_align.txt	|GAGATGCA -> -------- on 490-497 with type as --------
RIKS181301A039A	RIKS181301A039A-7.24259-SR_R18.5045212.B180713_A6151.seq_align.txt	|GAGATGCA -> -------- on 490-497 with type as --------
RIKS181301A046A	RIKS181301A046A-1.24259-SR_R18.5045212.B180713_A6153.seq_align.txt	|GTAGGGGGAGATG -> ------------- on 483-495 with type as -------------
RIKS181301A046A	RIKS181301A046A-2.24259-SR_R18.5045212.B180713_A6154.seq_align.txt	|GGGGAGATG -> --------- on 487-495 with type as ---------
RIKS181301A046A	RIKS181301A046A-3.24259-SR_R18.5045212.B180713_A6155.seq_align.txt	|GGGGAGATG -> --------- on 487-495 with type as ---------
RIKS181301A046A	RIKS181301A046A-4.24259-SR_R18.5045212.B180713_A6156.seq_align.txt	|GGGGAGATG -> --------- on 487-495 with type as ---------
RIKS181301A046A	RIKS181301A046A-5.24259-SR_R18.5045212.B180713_A6157.seq_align.txt	|GGGGAGATG -> --------- on 487-495 with type as ---------
RIKS181301A046A	RIKS181301A046A-6.24259-SR_R18.5045212.B180713_A6158.seq_align.txt	|GGGGAGATG -> --------- on 487-495 with type as ---------
RIKS181301A046A	RIKS181301A046A-7.24259-SR_R18.5045212.B180713_A6159.seq_align.txt	|GTAGGGGGAGATG -> ------------- on 483-495 with type as -------------
RIKS181301A046A	RIKS181301A046A-8.24259-SR_R18.5045212.B180713_A6160.seq_align.txt	|GGGGAGATG -> --------- on 487-495 with type as ---------
RIKS181301A051A	RIKS181301A051A-1.24259-SR_R18.5045212.B180713_A6161.seq_align.txt	|AGGGGGAGATGCATATCTAACCT -> ----------------------- on 485-507 with type as -----------------------
RIKS181301A051A	RIKS181301A051A-2.24259-SR_R18.5045212.B180713_A6162.seq_align.txt	|AGGGGGAGATGCATATCTAACCT -> ----------------------- on 485-507 with type as -----------------------
RIKS181301A051A	RIKS181301A051A-3.24259-SR_R18.5045212.B180713_A6163.seq_align.txt	|GGGG -> ---- on 487-490 with type as ----
RIKS181301A051A	RIKS181301A051A-5.24259-SR_R18.5045212.B180713_A6165.seq_align.txt	|GGGG -> ---- on 487-490 with type as ----
RIKS181301A051A	RIKS181301A051A-6.24259-SR_R18.5045212.B180713_A6166.seq_align.txt	|AGGGGGAGATGCATATCTAACCT -> ----------------------- on 485-507 with type as -----------------------
RIKS181301A051A	RIKS181301A051A-7.24259-SR_R18.5045212.B180713_A6167.seq_align.txt	|AGGGGGAGATGCATATCTAACCT -> ----------------------- on 485-507 with type as -----------------------
RIKS181301A051A	RIKS181301A051A-8.24259-SR_R18.5045212.B180713_A6168.seq_align.txt	|G -> T on 486-486 with type as v;G -> T on 488-488 with type as v;GGAG -> ---- on 489-492 with type as ----;A -> T on 497-497 with type as v;A -> T on 499-499 with type as v;- -> T on 500-500 with type as -;AA -> TG on 503-504 with type as vi;C -> T on 506-506 with type as i;T -> G on 509-509 with type as v
RIKS181301A057A	RIKS181301A057A-1.24259-SR_R18.5045212.B180713_A6169.seq_align.txt	|GGGAGATG -> -------- on 488-495 with type as --------
RIKS181301A057A	RIKS181301A057A-2.24259-SR_R18.5045212.B180713_A6170.seq_align.txt	|GGGAGATG -> -------- on 488-495 with type as --------
RIKS181301A057A	RIKS181301A057A-3.24259-SR_R18.5045212.B180713_A6171.seq_align.txt	|GGGAGATG -> -------- on 488-495 with type as --------
RIKS181301A057A	RIKS181301A057A-7.24259-SR_R18.5045212.B180713_A6175.seq_align.txt	|GGGAGATG -> -------- on 488-495 with type as --------
RIKS181301A064A	RIKS181301A064A-1.24259-SR_R18.5045212.B180713_A6177.seq_align.txt	|GTAGGGGGAGATGCA -> --------------- on 483-497 with type as ---------------
RIKS181301A064A	RIKS181301A064A-2.24259-SR_R18.5045212.B180713_A6178.seq_align.txt	|GTAGGGGGAGATGCA -> --------------- on 483-497 with type as ---------------
RIKS181301A064A	RIKS181301A064A-4.24259-SR_R18.5045212.B180713_A6180.seq_align.txt	|AGGGGGAGATG -> ----------- on 485-495 with type as -----------;A -> - on 497-497 with type as -
RIKS181301A064A	RIKS181301A064A-5.24259-SR_R18.5045212.B180713_A6181.seq_align.txt	|GTAGGGGGAGATGCA -> --------------- on 483-497 with type as ---------------
RIKS181301A064A	RIKS181301A064A-6.24259-SR_R18.5045212.B180713_A6182.seq_align.txt	|GC -> -- on 495-496 with type as --
RIKS181301A064A	RIKS181301A064A-7.24259-SR_R18.5045212.B180713_A6183.seq_align.txt	|GTAGGGGGAGATGCA -> --------------- on 483-497 with type as ---------------
RIKS181301A064A	RIKS181301A064A-8.24259-SR_R18.5045212.B180713_A6184.seq_align.txt	|GC -> -- on 495-496 with type as --
RIKS181301A065A	RIKS181301A065A-1.24259-SR_R18.5045212.B180713_A6185.seq_align.txt	|GGGAGATG -> -------- on 488-495 with type as --------
RIKS181301A065A	RIKS181301A065A-2.24259-SR_R18.5045212.B180713_A6186.seq_align.txt	|GGGGGAGATG -> ---------- on 486-495 with type as ----------
RIKS181301A065A	RIKS181301A065A-3.24259-SR_R18.5045212.B180713_A6187.seq_align.txt	|GGGGGAGATG -> ---------- on 486-495 with type as ----------
RIKS181301A065A	RIKS181301A065A-6.24259-SR_R18.5045212.B180713_A6190.seq_align.txt	|GGGGGAGATG -> ---------- on 486-495 with type as ----------
RIKS181301A065A	RIKS181301A065A-7.24259-SR_R18.5045212.B180713_A6191.seq_align.txt	|GGGAGATG -> -------- on 488-495 with type as --------
RIKS181301A065A	RIKS181301A065A-8.24259-SR_R18.5045212.B180713_A6192.seq_align.txt	|GGGAGATG -> -------- on 488-495 with type as --------
RIKS181301A070A	RIKS181301A070A-1.24259-SR_R18.5045212.B180713_A6193.seq_align.txt	|GGGGAGATG -> --------- on 487-495 with type as ---------
RIKS181301A070A	RIKS181301A070A-2.24259-SR_R18.5045212.B180713_A6194.seq_align.txt	|GGGAGATGCA -> ---------- on 488-497 with type as ----------
RIKS181301A070A	RIKS181301A070A-3.24259-SR_R18.5045212.B180713_A6195.seq_align.txt	|GGGGAGATG -> --------- on 487-495 with type as ---------
RIKS181301A070A	RIKS181301A070A-4.24259-SR_R18.5045212.B180713_A6196.seq_align.txt	|GGGAGATGCA -> ---------- on 488-497 with type as ----------
RIKS181301A070A	RIKS181301A070A-5.24259-SR_R18.5045223.B180713_A6197.seq_align.txt	|GGGAGATGCA -> ---------- on 488-497 with type as ----------
RIKS181301A070A	RIKS181301A070A-6.24259-SR_R18.5045223.B180713_A6198.seq_align.txt	|GGGAGATGCA -> ---------- on 488-497 with type as ----------
RIKS181301A070A	RIKS181301A070A-7.24259-SR_R18.5045223.B180713_A6199.seq_align.txt	|GGGAGATGCA -> ---------- on 488-497 with type as ----------
RIKS181301A070A	RIKS181301A070A-8.24259-SR_R18.5045223.B180713_A6200.seq_align.txt	|GGGGAGATG -> --------- on 487-495 with type as ---------
RIKS181302A071A	RIKS181302A071A-1.24259-SR_R18.5045223.B180713_A6201.seq_align.txt	|CAGTAGGGGGAGATGCA -> ----------------- on 481-497 with type as -----------------
RIKS181302A071A	RIKS181302A071A-2.24259-SR_R18.5045223.B180713_A6202.seq_align.txt	|
RIKS181302A071A	RIKS181302A071A-3.24259-SR_R18.5045223.B180713_A6203.seq_align.txt	|CAGTAGGGGGAGATGCA -> ----------------- on 481-497 with type as -----------------
RIKS181302A071A	RIKS181302A071A-4.24259-SR_R18.5045223.B180713_A6204.seq_align.txt	|
RIKS181302A071A	RIKS181302A071A-5.24259-SR_R18.5045223.B180713_A6205.seq_align.txt	|
RIKS181302A071A	RIKS181302A071A-6.24259-SR_R18.5045223.B180713_A6206.seq_align.txt	|CAGTAGGGGGAGATGCA -> ----------------- on 481-497 with type as -----------------
RIKS181302A071A	RIKS181302A071A-7.24259-SR_R18.5045223.B180713_A6207.seq_align.txt	|
RIKS181302A071A	RIKS181302A071A-8.24259-SR_R18.5045223.B180713_A6208.seq_align.txt	|CAGTAGGGGGAGATGCA -> ----------------- on 481-497 with type as -----------------
RIKS181302A077A	RIKS181302A077A-1.24259-SR_R18.5045223.B180713_A6209.seq_align.txt	|
RIKS181302A077A	RIKS181302A077A-2.24259-SR_R18.5045223.B180713_A6210.seq_align.txt	|AGGGGGA -> ------- on 485-491 with type as -------;A -> T on 493-493 with type as v;G -> - on 495-495 with type as -;C -> T on 496-496 with type as i
RIKS181302A077A	RIKS181302A077A-3.24259-SR_R18.5045223.B180713_A6211.seq_align.txt	|GGGGGAGATG -> ---------- on 486-495 with type as ----------
RIKS181302A077A	RIKS181302A077A-4.24259-SR_R18.5045223.B180713_A6212.seq_align.txt	|GGGGGAGATG -> ---------- on 486-495 with type as ----------
RIKS181302A077A	RIKS181302A077A-5.24259-SR_R18.5045223.B180713_A6213.seq_align.txt	|GGGGGAGATG -> ---------- on 486-495 with type as ----------
RIKS181302A077A	RIKS181302A077A-6.24259-SR_R18.5045223.B180713_A6214.seq_align.txt	|GGGGAGATGCATATCTA -> ----------------- on 487-503 with type as -----------------
RIKS181302A077A	RIKS181302A077A-8.24259-SR_R18.5045223.B180713_A6216.seq_align.txt	|GGGGGAGATG -> ---------- on 486-495 with type as ----------
RIKS181302A118A	RIKS181302A118A-1.24259-SR_R18.5045223.B180713_A6217.seq_align.txt	|GGGGAG -> ------ on 487-492 with type as ------
RIKS181302A118A	RIKS181302A118A-2.24259-SR_R18.5045223.B180713_A6218.seq_align.txt	|GGGGAG -> ------ on 487-492 with type as ------
RIKS181302A118A	RIKS181302A118A-3.24259-SR_R18.5045223.B180713_A6219.seq_align.txt	|GGGGAG -> ------ on 487-492 with type as ------
RIKS181302A118A	RIKS181302A118A-4.24259-SR_R18.5045223.B180713_A6220.seq_align.txt	|GGGGAG -> ------ on 487-492 with type as ------
RIKS181302A118A	RIKS181302A118A-5.24259-SR_R18.5045223.B180713_A6221.seq_align.txt	|GGGGAGATGC -> ---------- on 487-496 with type as ----------
RIKS181302A118A	RIKS181302A118A-6.24259-SR_R18.5045223.B180713_A6222.seq_align.txt	|GGGGAGATGC -> ---------- on 487-496 with type as ----------
RIKS181302A118A	RIKS181302A118A-8.24259-SR_R18.5045223.B180713_A6224.seq_align.txt	|GGGGAG -> ------ on 487-492 with type as ------
RIKS181302A131A	RIKS181302A131A-1.24259-SR_R18.5045223.B180713_A6225.seq_align.txt	|GGGGAGATGC -> ---------- on 487-496 with type as ----------
RIKS181302A131A	RIKS181302A131A-2.24259-SR_R18.5045223.B180713_A6226.seq_align.txt	|GAGATG -> ------ on 490-495 with type as ------
RIKS181302A131A	RIKS181302A131A-3.24259-SR_R18.5045223.B180713_A6227.seq_align.txt	|GAGATG -> ------ on 490-495 with type as ------
RIKS181302A131A	RIKS181302A131A-5.24259-SR_R18.5045223.B180713_A6229.seq_align.txt	|GAGATG -> ------ on 490-495 with type as ------
RIKS181302A131A	RIKS181302A131A-6.24259-SR_R18.5045223.B180713_A6230.seq_align.txt	|GAGATG -> ------ on 490-495 with type as ------
RIKS181302A131A	RIKS181302A131A-7.24259-SR_R18.5045223.B180713_A6231.seq_align.txt	|GGGGAGATGC -> ---------- on 487-496 with type as ----------
RIKS181302A131A	RIKS181302A131A-8.24259-SR_R18.5045223.B180713_A6232.seq_align.txt	|GAGATG -> ------ on 490-495 with type as ------
RIKS181303A001A	RIKS181303A001A-1.24259-SR_R18.5045223.B180713_A6233.seq_align.txt	|AGGGGGAGATGCA -> ------------- on 485-497 with type as -------------
RIKS181303A001A	RIKS181303A001A-2.24259-SR_R18.5045223.B180713_A6234.seq_align.txt	|AGGGGGAGATGCA -> ------------- on 485-497 with type as -------------
RIKS181303A001A	RIKS181303A001A-6.24259-SR_R18.5045223.B180713_A6238.seq_align.txt	|AGGGGGAGATGCA -> ------------- on 485-497 with type as -------------
RIKS181303A014A	RIKS181303A014A-1.24259-SR_R18.5045223.B180713_A6241.seq_align.txt	|GGGAGATG -> -------- on 488-495 with type as --------
RIKS181303A014A	RIKS181303A014A-3.24259-SR_R18.5045223.B180713_A6243.seq_align.txt	|GGGGAGATGC -> ---------- on 487-496 with type as ----------
RIKS181303A014A	RIKS181303A014A-4.24259-SR_R18.5045223.B180713_A6244.seq_align.txt	|GGGAGATG -> -------- on 488-495 with type as --------
RIKS181303A014A	RIKS181303A014A-6.24259-SR_R18.5045223.B180713_A6246.seq_align.txt	|GGGAGATG -> -------- on 488-495 with type as --------
RIKS181303A014A	RIKS181303A014A-7.24259-SR_R18.5045223.B180713_A6247.seq_align.txt	|GGGAGATG -> -------- on 488-495 with type as --------
RIKS181303A014A	RIKS181303A014A-8.24259-SR_R18.5045223.B180713_A6248.seq_align.txt	|GGGAGATG -> -------- on 488-495 with type as --------
RIKS180900A042A	RIKS180900A042A-3.24259-SR_R18.5045194.B180713_A6027.seq_align.txt	Wild-Type
RIKS180901A008A	RIKS180901A008A-1.24259-SR_R18.5045194.B180713_A6041.seq_align.txt	Wild-Type
RIKS180901A008A	RIKS180901A008A-2.24259-SR_R18.5045194.B180713_A6042.seq_align.txt	Wild-Type
RIKS180901A008A	RIKS180901A008A-5.24259-SR_R18.5045194.B180713_A6045.seq_align.txt	Wild-Type
RIKS180901A039A	RIKS180901A039A-3.24259-SR_R18.5045194.B180713_A6083.seq_align.txt	Wild-Type
RIKS180901A039A	RIKS180901A039A-6.24259-SR_R18.5045194.B180713_A6086.seq_align.txt	Wild-Type
RIKS181301A010A	RIKS181301A010A-4.24259-SR_R18.5045212.B180713_A6132.seq_align.txt	Wild-Type
RIKS181301A021A	RIKS181301A021A-3.24259-SR_R18.5045212.B180713_A6139.seq_align.txt	Wild-Type
RIKS181301A021A	RIKS181301A021A-7.24259-SR_R18.5045212.B180713_A6143.seq_align.txt	Wild-Type
RIKS181301A039A	RIKS181301A039A-2.24259-SR_R18.5045212.B180713_A6146.seq_align.txt	Wild-Type
RIKS181301A039A	RIKS181301A039A-6.24259-SR_R18.5045212.B180713_A6150.seq_align.txt	Wild-Type
RIKS181301A039A	RIKS181301A039A-8.24259-SR_R18.5045212.B180713_A6152.seq_align.txt	Wild-Type
RIKS181301A057A	RIKS181301A057A-8.24259-SR_R18.5045212.B180713_A6176.seq_align.txt	Wild-Type
RIKS181303A001A	RIKS181303A001A-3.24259-SR_R18.5045223.B180713_A6235.seq_align.txt	Wild-Type
RIKS181303A001A	RIKS181303A001A-4.24259-SR_R18.5045223.B180713_A6236.seq_align.txt	Wild-Type
RIKS181303A001A	RIKS181303A001A-7.24259-SR_R18.5045223.B180713_A6239.seq_align.txt	Wild-Type
RIKS181301A057A	RIKS181301A057A-8.24259-SR_R18.5045212.B180713_A6176.seq_align.txt	Wild-Type
RIKS181303A001A	RIKS181303A001A-3.24259-SR_R18.5045223.B180713_A6235.seq_align.txt	Wild-Type
RIKS181303A001A	RIKS181303A001A-4.24259-SR_R18.5045223.B180713_A6236.seq_align.txt	Wild-Type
RIKS181303A001A	RIKS181303A001A-7.24259-SR_R18.5045223.B180713_A6239.seq_align.txt	Wild-Type
